24 **Abstract**

25 Cystic Fibrosis (CF) is a genetic disease that causes patients to accumulate thick,  
26 dehydrated mucus in the lung and develop chronic, polymicrobial infections due to  
27 reduced mucociliary clearance. These chronic polymicrobial infections and subsequent  
28 decline in lung function are significant factors in the morbidity and mortality of CF.  
29 *Pseudomonas aeruginosa* and *Streptococcus* spp. are among the most prevalent  
30 pathogens in the CF lung; the presence of *P. aeruginosa* correlates with lung function  
31 decline and the *Streptococcus milleri* group (SMG) is associated with exacerbations in  
32 CF patients. Here we characterize the interspecies interactions that occur between  
33 these two genera. We demonstrated that multiple *P. aeruginosa* laboratory strains and  
34 clinical CF isolates promote the growth of multiple SMG strains and oral *Streptococci* in  
35 an *in vitro* coculture system. We investigated the mechanism by which *P. aeruginosa*  
36 enhances growth of streptococci by screening for mutants of *P. aeruginosa* PA14  
37 unable to enhance *Streptococcus* growth, and we identified the *P. aeruginosa*  
38 *pqsL::TnM* mutant, which failed to promote growth of *S. constellatus* and *S. sanguinis*.  
39 Characterization of the *P. aeruginosa*  $\Delta pqsL$  mutant revealed that this strain cannot  
40 promote *Streptococcus* growth. Our genetic data and growth studies support a model  
41 whereby the *P. aeruginosa*  $\Delta pqsL$  mutant outcompetes *Streptococcus sanguinis* for  
42 limited iron. We propose a model whereby competition for iron represents one important  
43 means of interaction between *P. aeruginosa* and *Streptococcus* spp.

44

45 **Importance**

46 Cystic fibrosis (CF) lung infections are increasingly recognized for their polymicrobial  
47 nature. These polymicrobial infections could alter the biology of the organisms involved  
48 in CF-related infections, leading to changes in growth or virulence and could affect  
49 patient health. In this study, we demonstrate interactions between *P. aeruginosa* and  
50 streptococci using a coculture model, and demonstrate that one interaction between  
51 these microbes is likely competition for iron. Thus, these data indicate that one CF  
52 pathogen may influence the growth of another. This study adds to our limited knowledge  
53 of polymicrobial interactions.

## 54 **Introduction**

55 Cystic fibrosis (CF) is a genetic disease caused by a defect in the cystic fibrosis  
56 transmembrane conductance regulator (1), which leads to reduced mucociliary  
57 clearance in the lungs of these patients (2). Due to the reduced mucociliary clearance,  
58 bacteria colonize the lungs of patients with CF and establish chronic, polymicrobial  
59 infections that cause increased inflammation and respiratory function decline (2).  
60 Recent studies have demonstrated that the microbiota in the lungs form polymicrobial  
61 biofilms, and that mixed bacterial biofilm populations can affect antibiotic tolerance and  
62 bacterial virulence (3, 4).

63 The *Streptococcus milleri* group (SMG), which is composed of three species (*S.*  
64 *anginosus*, *S. constellatus*, and *S. intermedius*) has been isolated from sputum samples  
65 of patients with CF. When these microbes are the numerically dominant species in the  
66 lung, these organisms correlate with exacerbation in patients with CF (5–8). In contrast,  
67 previous research from our laboratory (9) and a second group (10) demonstrated that  
68 increased relative abundance of *Streptococcus* spp. within the CF lung microbiome  
69 correlates with better lung function and clinical stability. Together these data indicate a  
70 possible complex relationship between *Streptococcus* spp. and the host, and  
71 *Streptococcus* spp. and the other microbes in the CF airway.

72 *Pseudomonas aeruginosa* becomes the dominant microorganism in the lungs of  
73 ~45% of adults patients with CF (11), is cultured from >80% of these patients (12), and  
74 is the dominant microbe in the lung at end stage disease (13). Both *P. aeruginosa* and  
75 streptococci have been found to co-colonize CF patients (5–8, 14), but the polymicrobial  
76 interactions that occur between these organisms are not well studied. Previous studies

77 investigating interactions between *P. aeruginosa* and *Streptococcus* spp. demonstrated  
78 that *Streptococcus* spp. can influence production of *P. aeruginosa* virulence factors  
79 such as rhamnolipids, elastase, and phenazines (15–19) and can suppress *P.*  
80 *aeruginosa* growth through hydrogen peroxide production (15) and subsequent reactive  
81 nitrogenous intermediates (20, 21). Conversely, *P. aeruginosa* was found to influence  
82 the growth (15, 17, 19, 22) and biofilm formation (22, 23) of *Streptococcus* spp. Work  
83 from our lab demonstrated that *P. aeruginosa* PA14 produces the surfactants  $\beta$ -  
84 hydroxyalkanoyl- $\beta$ -hydroxyalkanoic acids (HAAs) and monorhamnolipids which caused  
85 a 6-fold reduction in *S. constellatus* 7155 biofilm formation in coculture (22). The  
86 surfactant-induced biofilm suppression was relieved when *P. aeruginosa* and *S.*  
87 *constellatus* 7155 were cocultured in the presence of tobramycin, an antibiotic used for  
88 maintenance therapy by patients with CF. We determined that tobramycin suppressed  
89 *P. aeruginosa* production of HAAs and monorhamnolipids, and that in the presence of  
90 tobramycin, *P. aeruginosa* can enhance *S. constellatus* 7155 growth on a CF-derived  
91 bronchial epithelial cell (CFBE) monolayer (22). These data indicate that *P. aeruginosa*  
92 can both positively and negatively impact cocultured microbes, including *Streptococcus*  
93 spp., and the interaction between the microbes can be influenced by environmental  
94 context.

95 In this study, we investigate the ability of *P. aeruginosa* to influence  
96 *Streptococcus* growth in our *in vitro* coculture system. We demonstrate that multiple *P.*  
97 *aeruginosa* strains and clinical isolates can enhance the growth of multiple  
98 *Streptococcus* spp. We used a candidate genetic approach and a genetic screen to  
99 identify *P. aeruginosa* mutants that were unable to support *Streptococcus* growth, and

100 found a single mutant of *P. aeruginosa* that no longer enhances growth of streptococci.  
101 We found that the *P. aeruginosa*  $\Delta pqsL$  mutant suppressed *S. sanguinis* growth, likely  
102 via a mechanism that involves iron sequestration. These data indicate that competition  
103 for iron can impact this polymicrobial interaction.

## 104 **Results**

105

106 ***P. aeruginosa* promotes streptococcal growth in a coculture system.** We reported  
107 previously that *P. aeruginosa* can enhance viable *S. constellatus* 7155 cell number  
108 when grown as a coculture on CF-derived bronchial epithelial (CFBE) cells (22). We first  
109 sought to recapitulate the finding that *P. aeruginosa* promotes the *Streptococcus* biofilm  
110 population by using the model organism *S. sanguinis* SK36 in coculture conditions in  
111 the absence of CFBE cells. We used *P. aeruginosa* PAO1 and *S. sanguinis* SK36 for  
112 these experiments because both are sequenced strains (24–26) with available genetic  
113 mutant libraries (27–29). This simplified coculture system allowed us to test the  
114 interaction between *P. aeruginosa* and *Streptococci* without confounding factors  
115 contributed by the CFBE cells.

116 To test the hypothesis that *S. sanguinis* SK36 viable cell number increases in  
117 coculture with *P. aeruginosa* PAO1 in absence of CFBE cells, we grew *P. aeruginosa*  
118 PAO1 and *S. sanguinis* SK36 in coculture in the wells of a plastic culture dish. We  
119 observed that the number of viable *S. sanguinis* SK36 in a biofilm was enhanced 100-  
120 1055-fold by coculture with *P. aeruginosa* PAO1 compared to *S. sanguinis* SK36 grown  
121 as a monoculture (Fig. 1A, see also Fig. S1A). *P. aeruginosa* PAO1 biofilm growth was  
122 not significantly affected by coculture with *S. sanguinis* SK36 (Fig. S1B). These data  
123 indicate that the enhancement of *S. sanguinis* SK36 populations in a biofilm by *P.*  
124 *aeruginosa* PAO1 does not require the CFBE cells.

125

126 ***P. aeruginosa* enhances growth of *S. sanguinis* SK36.** We considered two models of  
127 polymicrobial interaction that may be enhancing viable, *S. sanguinis* SK36 cells in the  
128 biofilm when grown in co-culture with *P. aeruginosa*. *P. aeruginosa* might promote  
129 *Streptococcus* adhesion and biofilm formation, or *P. aeruginosa* may promote  
130 streptococcal growth. To distinguish between these models, we conducted a time  
131 course experiment with *P. aeruginosa* PA14, *P. aeruginosa* PAO1, and *S. sanguinis*  
132 SK36. If *P. aeruginosa* was promoting adhesion of *S. sanguinis* SK36 cells rather than  
133 growth, we predict that we would detect more *S. sanguinis* SK36 in the biofilm and  
134 fewer planktonic cells, but total cell number is not increased compared to *S. sanguinis*  
135 SK36 monoculture. In contrast, if *P. aeruginosa* were enhancing *S. sanguinis* SK36  
136 growth, then both total biofilm and planktonic *S. sanguinis* SK36 populations should  
137 increase in coculture compared to *S. sanguinis* SK36 monoculture. As demonstrated by  
138 the increased *S. sanguinis* SK36 biofilm and planktonic cells recovered from coculture  
139 compared to monoculture, *P. aeruginosa* appears to promote the growth of *S. sanguinis*  
140 SK36 (Fig. 1B and Fig. S2A and S2B), thus accounting for the increased population of  
141 *S. sanguinis* SK36 biofilm cells.

142

143 **Multiple *P. aeruginosa* strains enhance the growth of multiple streptococci.** Based  
144 on current evidence that multiple *Streptococcus* species inhabit the CF lung (30, 31)  
145 and influence patient health (5–10, 14), we sought to determine whether the observed  
146 enhancement of *Streptococcus* viable counts in coculture with *P. aeruginosa* may be  
147 more broadly generalized to other streptococci, including the *Streptococcus milleri*  
148 group (SMG), which has been implicated in CF-related exacerbations (5–8). To assess



149 the ability of *P. aeruginosa* to promote multiple *Streptococcus* spp., we cocultured *P.*  
150 *aeruginosa* PAO1 with 6 SMG isolates and 8 oral *Streptococcus* spp. Figure 1C depicts  
151 a representative strain of each streptococcal species assayed, and shows the biofilm  
152 population obtained from monoculture and coculture with *P. aeruginosa* PAO1,  
153 respectively (see Fig. S3A for all 14 strains tested). *P. aeruginosa* PAO1 growth was not  
154 significantly affected by coculture with any of the *Streptococcus* spp. tested (Fig. S3B).

155 We found that *P. aeruginosa* PAO1 significantly enhanced the growth of one of  
156 the two *S. anginosus*, two of two *S. intermedius*, and neither of the two *S. constellatus*  
157 strains tested. Additionally, of the oral *Streptococcus* spp. tested, *P. aeruginosa* PAO1  
158 significantly promoted the growth of one of the two *S. oralis*, the one *S. parasanguinis*,  
159 and one of the three *S. salivarius* isolates, but not the *S. pneumoniae* or *S. peroris*  
160 isolates tested (Fig. 1C and Fig. S3A). While not every *Streptococcus* isolate tested  
161 demonstrated significant increase in viable population recovered from the coculture,  
162 most species tested exhibited a trend toward increased growth when cocultured with *P.*  
163 *aeruginosa* PAO1. These coculture data suggest that *P. aeruginosa* may be promoting  
164 *Streptococcus* growth through a pathway that affects many *Streptococcus* species.

165 Next we assessed whether multiple *P. aeruginosa* clinical and laboratory strains  
166 could promote the growth of *S. sanguinis*. Additionally, given that *S. parasanguinis* was  
167 found to bind extracellular alginate produced by mucoid *P. aeruginosa* strains (23), we  
168 tested whether mucoid or nonmucoid *P. aeruginosa* could better promote growth in our  
169 coculture system. We cocultured *S. sanguinis* SK36 with seven nonmucoid *P.*  
170 *aeruginosa* and four mucoid *P. aeruginosa* laboratory and clinical strains, and observed  
171 a significant growth enhancement of *S. sanguinis* SK36 by ten out of eleven *P.*

172 *aeruginosa* strains tested in coculture biofilms (Fig. 1D) and planktonic growth (Fig.  
173 S4A). The growth of all tested *P. aeruginosa* strains was not affected by coculture with  
174 *S. sanguinis* SK36 (Fig. S4B, S4C).

175         Additionally, *P. aeruginosa* PAO1 (parental) and *P. aeruginosa* PDO300 *mucA22*  
176 are isogenic nonmucoid and mucoid strains, respectively. We found a significant  
177 enhancement in viable *S. sanguinis* SK36 biofilm cells recovered from coculture with *P.*  
178 *aeruginosa* PDO300 *mucA22* compared to *P. aeruginosa* PAO1, suggesting that  
179 mucoid *P. aeruginosa* strains may better enhance *Streptococcus* growth. Additionally,  
180 these mucoid *P. aeruginosa* strains showed among the most robust promotion of viable  
181 counts when cocultured with *Streptococcus*.

182         In summary, we have demonstrated that our minimal medium coculture assay  
183 using a plastic substratum can recapitulate our prior observation that *P. aeruginosa*  
184 promotes streptococcal growth. We were able to determine that *P. aeruginosa* is likely  
185 promoting *Streptococcus* growth rather than increasing the biofilm population via  
186 enhanced adherence. The *Streptococcus* growth-enhancement phenotype occurred  
187 among most oral *Streptococci* tested, and the majority of *P. aeruginosa* clinical and  
188 laboratory strains are capable of promoting *Streptococcus* growth, which lends support  
189 to the idea that these interactions are common among these two genera.

190

191 **Known *P. aeruginosa* virulence pathways are not involved in the *Streptococcus***  
192 **growth-promoting phenotype.** *P. aeruginosa* has many well characterized virulence  
193 factors that have been demonstrated to impact polymicrobial interactions, including  
194 pathways for quorum sensing (32), biofilm formation, and the production of secreted

195 molecules such as phenazines (33, 34), siderophores (3, 35), alginate (36), and  
196 rhamnolipids (22). We hypothesized that one or more of these virulence factors might  
197 be altering *Streptococcus* growth in our system. To test this idea, we utilized a  
198 candidate genetic approach to assess whether any of these virulence pathways may be  
199 involved in the observed growth-enhancing phenotype. We cocultured *P. aeruginosa*  
200 PA14 mutants in each of the above pathways with *S. constellatus* 7155 as a model  
201 streptococcal strain known to positively respond to *P. aeruginosa* growth enhancement  
202 (22), and assessed whether any of these mutants lost the ability to enhance *S.*  
203 *constellatus* 7155 growth. We found that none of the pathways tested were involved in  
204 enhancement of *S. constellatus* 7155 growth (Table S1).

205 We also constructed *P. aeruginosa* PA14  $\Delta katA$ ,  $\Delta katB$ , and  $\Delta katAkatB$  mutant  
206 strains in order to test the hypothesis that extracellular *P. aeruginosa* catalase is  
207 enhancing *S. sanguinis* SK36 growth by breaking down hydrogen peroxide produced by  
208 *S. sanguinis* SK36 given that KatA has been found in the supernatant of *P. aeruginosa*  
209 cultures (37–39). It has previously been reported that *S. sanguinis* and other oral  
210 streptococci can inhibit *P. aeruginosa* growth through hydrogen peroxide production  
211 (15, 20, 21), and that the hydrogen peroxide produced by oral streptococci plays an  
212 important role in growth inhibition, eDNA release, and biofilm formation within the oral  
213 microbiome (reviewed in 40 and 41). We chose to mutate the *katA* and *katB* genes and  
214 not the *katE* gene because previous reports indicate that KatA is the major catalase  
215 utilized by *P. aeruginosa*, and that KatB can partially recover hydrogen peroxide  
216 resistance in the absence of KatA (37, 42). Meanwhile, KatE was not demonstrated to  
217 play a role in alleviating hydrogen peroxide stress (42). *S. sanguinis* SK36 did not

218 demonstrate reduced growth in coculture with the *P. aeruginosa* PA14  $\Delta katA$ ,  $\Delta katB$ , or  
219  $\Delta katA\Delta katB$  mutant strains compared to wild-type *P. aeruginosa* PA14, indicating that  
220 catalase is not playing a role in the *Streptococcus* growth enhancement phenotype (Fig.  
221 S5A). The *P. aeruginosa*  $\Delta katA$  mutant displays a slight, significant growth defect in the  
222 coculture compared to *P. aeruginosa* PA14 in coculture, and the  $\Delta katB$  mutant displays  
223 a modest, but significant growth defect in monoculture compared to *P. aeruginosa* PA14  
224 in coculture (Fig. S5B). Taken together, these data suggest known virulence factors, on  
225 their own, do not contribute to *P. aeruginosa*-mediated growth enhancement of  
226 *Streptococcus* spp.

227

228 **Screening the *P. aeruginosa* PA14NR Set for *P. aeruginosa* PA14 transposon**  
229 **insertion mutant strains that do not support *S. constellatus* growth.** The Ausubel  
230 lab reported a nonredundant library of *P. aeruginosa* PA14 transposon insertion  
231 mutants (PA14NR Set) (43). The PA14NR Set contains 5,459 transposon insertion  
232 mutant strains with mutations in 4,596 genes. Each of these *P. aeruginosa* PA14  
233 transposon mutant strains was tested in coculture with *S. constellatus* 7155 (Fig. 2A).  
234 Of the 5,459 mutant strains in the library, 48 strains were unable to promote *S.*  
235 *constellatus* 7155 growth in two replicate experiments (Table S2). Two of these 48  
236 mutants were eliminated when we tested available deletion mutants as they did not  
237 recapitulate the phenotype of the transposon mutation (not shown). The remaining 46  
238 transposon mutants (Table S2) were tested in our standard coculture with *S. sanguinis*  
239 SK36 to determine which *P. aeruginosa* PA14 transposon mutants are unable to  
240 enhance *Streptococcus* growth in a second strain. 44 of the 46 *P. aeruginosa* PA14

241 transposon mutants were capable of enhancing growth of *S. sanguinis* SK36, and thus  
242 were unlikely involved in a general pathway for enhancing growth of *Streptococcus*. We  
243 found that two transposon mutants were unable to promote either *S. constellatus* 7155  
244 or *S. sanguinis* SK36 growth: *P. aeruginosa* *pqsL::TnM* and *P. aeruginosa* *dbpA::TnM*.

245         The *dbpA* gene codes for the RNA helicase DbpA, which has been demonstrated  
246 to play a role in the formation of the 50S ribosomal subunit in *Escherichia coli* (reviewed  
247 in 44). *E. coli* is able to compensate for  $\Delta dbpA$  deletions in forming the 50S ribosomal  
248 subunit, as described previously (45). An inability to form the 50S ribosomal subunit  
249 would otherwise cause a lethal protein synthesis defect, and a dominant negative *dbpA*  
250 mutant strain is necessary to observe a defect in DbpA function. We built and assayed  
251 the *P. aeruginosa* PA14  $\Delta dbpA$  mutant strain and found no significant defect in *S.*  
252 *sanguinis* SK36 growth enhancement (Fig. S6A) or in *P. aeruginosa* growth (Fig. S6B),  
253 and thus did not pursue further study of this mutant.

254         We previously studied the effects of the *Pseudomonas* quinolone signal pathway  
255 (*pqs*) on interactions between *P. aeruginosa* and *Staphylococcus aureus*, including the  
256 utilization of 2-heptyl-4-hydroxyquinoline-*N*-oxide (HQNO), a respiratory chain inhibitor,  
257 to drive *S. aureus* to fermentative metabolism (3, 35, 36). As was observed for *S.*  
258 *constellatus* 7155, there was a significant reduction in the ability of *P. aeruginosa*  
259 *pqsL::TnM* mutant to support *S. sanguinis* SK36 growth compared to the wild-type *P.*  
260 *aeruginosa* PA14 (Fig. 2B). There was no detectable growth defect of the *pqsL::TnM*  
261 mutant strain compared to wild-type *P. aeruginosa* PA14 in our assay condition (Fig.  
262 S7). We chose to focus on the *P. aeruginosa* *pqsL::TnM* mutant for the remainder of our  
263 study.

264

265 **The *P. aeruginosa*  $\Delta pqsL$  mutant has a defect in *Streptococcus* growth**

266 **enhancement.** The PQS pathway involves the production of multiple 4-hydroxy-2-  
267 alkylquinolones (HAQs) and begins with anthranilic acid, which is converted to  
268 intermediates of unknown structure by the enzymes PqsA and PqsD (Fig. 3A). These  
269 unknown intermediates can then be converted into HQNO by PqsL, our gene of interest,  
270 or 4-hydroxy-2-heptylquinoline (HHQ) by PqsB and PqsC. HHQ can then be converted  
271 into 3,4-dihydroxy-2-heptylquinoline (PQS) by PqsH (46–48). MvfR (also known as  
272 PqsR) is the transcriptional regulator that is activated by HHQ and PQS and positively  
273 regulates the transcription of operons involved in PQS, LasR, and RhIR quorum sensing  
274 pathways, as well as the operons required for production of the siderophores  
275 pyoverdine and pyochelin (49, 50). MvfR/PqsR and PQS have also been demonstrated  
276 to indirectly increase expression of the phenazine pyocyanin (49).

277 We considered two different mechanisms that could explain why the growth of *S.*  
278 *sanguinis* SK36 is no longer promoted by coculture with the *P. aeruginosa* PA14  
279 *pqsL::TnM*. We hypothesized that either the *pqsL::TnM* strain may no longer be able to  
280 promote *S. sanguinis* SK36 growth, or the loss of PqsL function resulted in a *P.*  
281 *aeruginosa* strain that reduced *S. sanguinis* SK36 viability. To distinguish between  
282 these hypotheses, we assessed the *Streptococcus* growth enhancement capabilities of  
283 *P. aeruginosa* PA14 deletion mutants in the *pqs* pathway when grown in coculture with  
284 *S. sanguinis* SK36. We found that the  $\Delta pqsL$  mutant was the only mutant in the *pqs*  
285 pathway that was unable to promote *S. sanguinis* SK36 growth (Fig. 3B and Fig. S8A

286 for *S. sanguinis* SK36 planktonic growth, Fig. S8B-C for *P. aeruginosa* biofilm and  
287 planktonic growth).

288 We complemented the  $\Delta pqsL$  strain with an arabinose inducible pMQ72-*pqsL*  
289 construct and demonstrated a significant increase in viable *S. sanguinis* SK36 biofilm  
290 cells recovered when the complemented strain was induced with 0.2% arabinose (Fig.  
291 3C and Fig. S9A for planktonic growth); there was no significant difference between  
292 wild-type *P. aeruginosa* PA14 and the complemented  $\Delta pqsL/pMQ72-pqsL$  strain.  
293 Additionally, there was no significant difference in *P. aeruginosa* biofilm and planktonic  
294 growth in medium amended with 0.2% arabinose, the inducer of the expression for the  
295 P<sub>BAD</sub> promoter on the pMQ72 plasmid (Fig. S9B-C).

296 Additionally, we assayed the *P. aeruginosa*  $\Delta pqsL$  mutant strain in coculture with  
297 a few representative *Streptococcus* spp. from Fig. 1B to determine if the  $\Delta pqsL$  mutant  
298 strain has a broad defect in *Streptococcus* growth enhancement (Fig. 3D). We found  
299 that for *S. intermedius* 4807, there was a slight but nonsignificant growth decrease  
300 during coculture with *P. aeruginosa*  $\Delta pqsL$ , indicating that the mutant strain is unable to  
301 enhance *Streptococcus* growth. Similarly, we saw a nonsignificant decrease in *S.*  
302 *parasanguinis* 5357 growth in coculture with the  $\Delta pqsL$  mutant compared to wild-type *P.*  
303 *aeruginosa* PA14. We did observe a significant decrease in *S. anginosus* 5535 cells  
304 recovered from the coculture with the  $\Delta pqsL$  mutant strain compared to monoculture  
305 and coculture conditions with *P. aeruginosa* PA14, indicating that the  $\Delta pqsL$  mutation is  
306 contributing to the repression of the growth of *S. anginosus* 5535. We found that both  
307 wild-type *P. aeruginosa* PA14 and the  $\Delta pqsL$  mutant strain caused a nonsignificant  
308 reduction in *S. intermedius* 7155 cells recovered from coculture, indicating that both of



309 these *P. aeruginosa* strains may be able to outcompete *S. intermedius* 7155. We saw  
310 no significant changes to *P. aeruginosa* growth while in coculture with these  
311 representative *Streptococcus* spp. (Fig. S10).

312

313 **The *P. aeruginosa*  $\Delta pqsL$  mutant likely suppresses *S. sanguinis* SK36 growth via**  
314 **iron sequestration.** It has been demonstrated previously that a *pqsL* mutant is deficient  
315 in HQNO production and overproduces PQS (47). Exogenous PQS has been  
316 demonstrated to chelate iron and to increase the expression of the genes coding for  
317 siderophore and phenazine biosynthesis enzymes in *P. aeruginosa* (51–53). Thus, we  
318 hypothesized that it was the increased production of PQS and/or increased expression  
319 of one or more PQS-regulated genes that caused the observed loss in growth  
320 promotion of *S. sanguinis* SK36.

321 To test our hypothesis, we assayed *S. sanguinis* SK36 in coculture with the  
322  $\Delta pqsL$  mutant strains deficient in production of the virulence factors regulated by PQS:  
323 siderophores ( $\Delta pqsL\Delta pvdA\Delta pchE$ ) and phenazines ( $\Delta pqsL\Delta phzA-G1/2$ ) (49, 51–53).  
324 We found that the *P. aeruginosa*  $\Delta pqsL\Delta pvdA\Delta pchE$  deletion mutant strain restored *S.*  
325 *sanguinis* SK36 growth enhancement to levels similar to wild-type *P. aeruginosa* PA14  
326 (Fig. 4A) without affecting *P. aeruginosa* growth (Fig. S11). In contrast, the *P.*  
327 *aeruginosa*  $\Delta pqsL\Delta phzA-G1/2$  mutant did not restore *S. sanguinis* SK36 growth (Fig.  
328 4A, Fig. S11).

329 One prediction of this iron sequestration model is that iron supplementation  
330 should restore the *Streptococcus* enhancing activity of the *P. aeruginosa*  $\Delta pqsL$  mutant.  
331 We added 50 $\mu$ M FeCl<sub>3</sub> to our minimal medium coculture conditions and saw restoration



332 of *S. sanguinis* SK36 growth enhancement 6 out of 18 times. We explored this  
333 phenotype using different FeCl<sub>3</sub> concentrations, making a fresh FeCl<sub>3</sub> solution daily,  
334 using buffered media in our assay and when making the FeCl<sub>3</sub> stock solution, but the  
335 phenotype was still variable. We do not fully understand why the iron rescue phenotype  
336 was so variable. We measured the iron levels of the medium used in our coculture  
337 conditions (MEM) using ICP/MS and showed that the concentration of iron is below the  
338 limit of detection (<5 ppb), so it is plausible that the streptococci are iron limited in our  
339 coculture conditions.

340         Next, we tested the idea that coculture in anaerobic conditions would also lead to  
341 recovery of the *Streptococcus* growth promotion phenotype in the  $\Delta pqsL$  mutant,  
342 because *P. aeruginosa* has been demonstrated to reduce pyoverdine and pyochelin  
343 production in anoxic conditions (54). Upon anaerobic coculture in an AnaeroPak-Anaero  
344 container with a GasPak satchet, the *P. aeruginosa*  $\Delta pqsL$  mutant significantly  
345 enhanced *S. sanguinis* SK36 viability compared to coculture under aerobic conditions  
346 (Fig. 4B and Fig. S12A). The level of *S. sanguinis* growth enhancement promoted by  
347 the *P. aeruginosa*  $\Delta pqsL$  mutant in anaerobic conditions was equivalent to that  
348 observed for the WT *P. aeruginosa*. Additionally, if *P. aeruginosa* were enhancing *S.*  
349 *sanguinis* SK36 growth solely through oxygen consumption, we would expect to see  
350 enhanced *S. sanguinis* growth in monoculture under anaerobic conditions, which we do  
351 not observe here.

352         We note that *P. aeruginosa* biofilm and planktonic growth were decreased under  
353 the anaerobic growth conditions used in these experiments compared to what we  
354 typically observe under aerobic conditions (Fig. S12B-C), which is not surprising given

355 that aerobic respiration is the main means of energy generation for this microbe.

356 Together, these data indicate that wild-type *P. aeruginosa* is contributing to the growth

357 *S. sanguinis* SK36 via a mechanism independent of oxygen consumption in our

358 coculture system, and are consistent with our hypothesis that reduced siderophore

359 production under anaerobic conditions mitigates the phenotype of the  $\Delta pqsL$  mutant.

360

361 **An iron ABC transporter of *S. sanguinis* SK36 participates in competition with *P.***

362 ***aeruginosa*.** Our data suggest that one component of the interaction between *P.*

363 *aeruginosa* and *Streptococcus* spp. is the competition for iron. The genome of *S.*

364 *sanguinis* SK36 has been sequenced and annotated, and using this information we

365 identified several gene products that, based on their annotation, might be involved in

366 iron uptake. We predicted that if *S. sanguinis* SK36 is indeed competing with *P.*

367 *aeruginosa* for iron, loss of one or more of these iron uptake system would compromise

368 the ability of *S. sanguinis* SK36 to grow in coculture with *P. aeruginosa*. Given that the

369  $\Delta pqsL$  mutant likely has an enhanced capacity to scavenge iron as indicated by the

370 restoration of *S. sanguinis* SK36 growth enhancement by the  $\Delta pqsL\Delta pvdA\Delta pchE$

371 mutant, any compromise observed for *S. sanguinis* SK36 iron acquisition mutants

372 should be exacerbated in coculture with *P. aeruginosa*  $\Delta pqsL$ .

373 Xu and colleagues reported a mutant library of *S. sanguinis* SK36 wherein non-

374 essential genes are deleted and replaced with a kanamycin resistance cassette (27,

375 28). Using this library, we examined whether selected *S. sanguinis* SK36 mutant strains

376 lacking genes involved in iron uptake (Table 1) have reduced growth in the presence of

377 wild-type *P. aeruginosa* PA14 or the *P. aeruginosa*  $\Delta pqsL$  strain. We tested *S. sanguinis*

378 SK36 strains carrying mutations in genes coding for iron regulatory proteins, an iron-  
379 binding lipoprotein, a ferrichrome-binding protein, and predicted iron-uptake ABC  
380 transporters using the coculture assay. We found that all of the mutant strains tested  
381 behaved like wild-type *S. sanguinis* SK36 in coculture, except for the *S. sanguinis* SK36  
382 Ssx\_1742 and Ssx\_1744 mutant strains (Fig. 4C and S13A). The SSA\_1742 gene  
383 codes for a predicted ferrichrome-binding protein and the SSA\_1744 gene codes for a  
384 predicted permease protein of an iron compound ABC transporter.

385 The *S. sanguinis* SK36 Ssx\_1742 and Ssx\_1744 mutant strains demonstrated  
386 reduced growth in monoculture conditions, 6.5-fold and 6.9-fold respectively, indicating  
387 that they may be iron starved in our minimal medium growth conditions (Fig. 4C). This  
388 iron starvation phenotype is exacerbated in coculture with wild-type *P. aeruginosa* PA14  
389 with a 44.9-fold reduction in Ssx\_1742 cells and a 5.5-fold reduction in Ssx\_1744 cells  
390 obtained from coculture compared to wild-type *S. sanguinis* SK36 coculture.

391 In coculture with the *P. aeruginosa*  $\Delta pqsL$  mutant strain, there is a significant,  
392 4.9-fold reduction in Ssx\_1742 cells compared to wild-type *S. sanguinis* SK36 in  
393 coculture with the  $\Delta pqsL$  mutant. Importantly, coculture of the *S. sanguinis* SK36  
394 Ssx\_1744 mutant strain showed no additional, significant growth defect when grown in  
395 coculture with the *P. aeruginosa*  $\Delta pqsL$  mutant compared to the WT *P. aeruginosa*  
396 strain. We take this result to mean that the increased iron sequestration by the  $\Delta pqsL$   
397 mutant is competing for the iron typically transported by the *S. sanguinis* SK36  
398 Ssx\_1744-encoded iron ABC transporter; thus loss of Ssx\_1744 confers no additional  
399 phenotype when cocultured with the *P. aeruginosa* PA14  $\Delta pqsL$  mutant. Finally, we

400 observed no significant difference in *P. aeruginosa* PA14 and the  $\Delta pqsL$  mutant strain  
401 growing in coculture with *S. sanguinis* SK36 mutant strains (Fig. S13B and S13C).

## 402 Discussion

403 In this study, we sought to characterize a polymicrobial interaction that occurs  
404 between *P. aeruginosa* and *Streptococcus* spp. We previously demonstrated that *P.*  
405 *aeruginosa* can suppress *S. constellatus* 7155 biofilms through surfactant production,  
406 and that this suppression can be alleviated through treatment with the CF maintenance  
407 antibiotic, tobramycin (22). Our current work adds to our understanding of *P. aeruginosa*  
408 – *Streptococcus* interactions by demonstrating the widespread ability of multiple *P.*  
409 *aeruginosa* clinical isolates from CF patients and laboratory strains to enhance the  
410 growth of multiple species of *Streptococcus*. To better understand the basis of the ability  
411 of *P. aeruginosa* to promote the growth of *Streptococcus* spp., we screened *P.*  
412 *aeruginosa* transposon insertion mutants to identify factors that contribute to the ability  
413 of *P. aeruginosa* to enhance growth of *S. constellatus* - we identified 46 candidate  
414 mutants. Following up on these mutants, we identified only one strain carrying a  
415 mutation in the *pqsL* gene that has a consistent, reduced *Streptococcus* spp. growth  
416 enhancement phenotype versus multiple species of *Streptococcus*. Upon further  
417 investigation we revealed that this mutant no longer promotes *Streptococcus* growth  
418 because the *P. aeruginosa*  $\Delta pqsL$  mutant strain likely actively competes with  
419 *Streptococcus* for iron. Loss of PqsL function has been reported to enhance PQS  
420 production (47), excess PQS has been demonstrated to enhance siderophore  
421 biosynthesis gene transcription (51–53), and PQS-mediated iron sequestration by *P.*  
422 *aeruginosa* has been demonstrated to reduce growth of both gram positive and gram  
423 negative soil bacteria (32). This PQS-mediated growth inhibition of soil bacterial growth  
424 can be restored upon addition of 50 $\mu$ M FeCl<sub>3</sub> (32). Similarly, our data show the ability to

425 restore *Streptococcus* growth by introducing mutations in the siderophore genes to the  
426  $\Delta pqsL$  mutant or by growing the cocultures anaerobically, a growth condition where *P.*  
427 *aeruginosa* is known to reduce pyoverdine and pyochelin production (54). We cannot  
428 rule out that the increased siderophore production in the  $\Delta pqsL$  mutant impacts  
429 production of reactive oxygen species that may be toxic to *Streptococcus* spp.; the fact  
430 that growth of the  $\Delta pqsL$  mutant under anaerobic conditions reverses its phenotype is  
431 consistent with this idea.

432 An interesting observation from this study was the demonstration of a significant  
433 increase in *S. sanguinis* SK36 biofilm growth between an isogenic nonmucoid and  
434 mucoid *P. aeruginosa* PAO1 strain (Fig. 1D). Previous work demonstrated that *S.*  
435 *parasanguinis* is able to use the streptococcal surface adhesin BapA1 to bind alginate  
436 produced by mucoid *P. aeruginosa* and enhance *S. parasanguinis* biofilm formation *in*  
437 *vitro*, however *S. gordonii* and *S. sanguinis* SK36 did not demonstrate enhanced biofilm  
438 formation (23). Here we demonstrate a significant growth increase of *S. sanguinis* SK36  
439 when in coculture with *P. aeruginosa* PDO300 *mucA22* compared to the isogenic  
440 nonmucoid strain. It is possible that *S. sanguinis* SK36 can also bind to alginate.  
441 Alternatively, we hypothesize that the growth enhancement induced by the mucoid *P.*  
442 *aeruginosa* strain may be due to decreased rhamnolipid production that has been  
443 described in mucoid strains (36) and the corresponding relief of rhamnolipid-induced  
444 *Streptococcus* killing (22). Furthermore, mucoid strains were shown to produce lower  
445 levels of products of the PQS pathway and reduced levels of siderophores (36). Thus,  
446 *Streptococcus* spp. may more readily co-exist, and perhaps grow to larger numbers, in  
447 patients with mucoid *P. aeruginosa*, a question that could be answered by performing a

448 clinical study assessing relative levels of *Streptococcus* spp. as a function of mucoid *P.*  
449 *aeruginosa*. Furthermore, these data indicate that the interactions between *P.*  
450 *aeruginosa* and *Streptococcus* may change over the lifetime of patients with CF as the  
451 colonizing *P. aeruginosa* converts to mucoidy.

452 Oral streptococci have been demonstrated to utilize hydrogen peroxide to inhibit  
453 the growth and colonization of competing microorganisms (15, 20, 21, 40), and we  
454 hypothesized that *P. aeruginosa* catalase might play a role in enhancing *Streptococcus*  
455 growth as catalase has been found in the supernatant of *P. aeruginosa* cultures (38, 39,  
456 42). However, we found no significant defect in *S. sanguinis* SK36 growth enhancement  
457 by our *P. aeruginosa*  $\Delta katA$ ,  $\Delta katB$ , and  $\Delta katA\Delta katB$  compared to wild-type *P.*  
458 *aeruginosa* PA14 indicating that catalase is not the factor produced by *P. aeruginosa*  
459 that is enhancing *Streptococcus* growth. It has been demonstrated that *P. aeruginosa*  
460 does not secrete catalase and that it is found in the supernatant due *P. aeruginosa* cell  
461 lysis (38) – it may be that catalase found in the supernatant is too dilute to have a  
462 positive influence on *Streptococcus* growth in coculture, or that the hydrogen peroxide is  
463 not growth limiting to the streptococci in our coculture conditions. Thus, we conclude  
464 that *P. aeruginosa* catalase is not influencing *Streptococcus* growth in our model  
465 system. It is also worth noting that anaerobic coculture was not sufficient to enhance *S.*  
466 *sanguinis* SK36 monoculture growth to the same levels achieved during coculture with  
467 *P. aeruginosa* PA14 in aerobic conditions (Fig. 4B). These data indicate that *P.*  
468 *aeruginosa*-mediated growth enhancement of streptococci cannot be explained by  
469 oxygen consumption via *P. aeruginosa*.

470 To better understand how *S. sanguinis* SK36 might compete with *P. aeruginosa*  
471 for iron in iron deplete conditions, we examined a set of *S. sanguinis* SK36 mutants  
472 lacking putative iron uptake systems or regulatory genes. Of the nine mutants tested,  
473 only two showed reduced growth of *S. sanguinis* SK36 when in coculture with *P.*  
474 *aeruginosa* PA14, Ssx\_1742 lacking a ferrichrome-binding protein and Ssx\_1744  
475 lacking the permease protein of an iron-compound ABC transporter (Fig. 4C and S12).  
476 The Ssx\_1742 mutant demonstrated a significant growth defect in monoculture, and  
477 during coculture with *P. aeruginosa* PA14. The growth defect of the Ssx\_1742 mutant  
478 was worsened when cocultured with the  $\Delta pqsL$  mutant. Together, these data indicate  
479 that the Ssx\_1742 mutant strain is unable to compete with *P. aeruginosa* for the limited  
480 iron in our co-culture conditions, and that the ferrichrome-binding protein encoded by  
481 Ssx\_1742 is not involved in the competition for this metal with *P. aeruginosa*. In  
482 contrast, the Ssx\_1744 mutant showed no additional defect when cocultured with the  
483  $\Delta pqsL$  mutant versus the WT *P. aeruginosa*. We take this result to mean that the  
484 increased production of the siderophores in the  $\Delta pqsL$  mutant is competing for the iron  
485 typically transported by the *S. sanguinis* SK36 Ssx\_1744-encoded iron ABC transporter;  
486 thus loss of Ssx\_1744 confers no additional phenotype when cocultured with the *P.*  
487 *aeruginosa* PA14  $\Delta pqsL$  mutant. These data indicate that the Ssx\_1744-encoded iron  
488 ABC transporter of *S. sanguinis* SK36 plays a key role in the competition with *P.*  
489 *aeruginosa*.

490 Our data support a second mechanism whereby *P. aeruginosa* can limit the  
491 growth of *Streptococcus* spp. (Figure 5), including SMG, via iron sequestration. We  
492 previously reported that *P. aeruginosa* rhamnolipid surfactants could reduce the viability



493 of *S. constellatus*. *P. aeruginosa* can also influence the biofilm formation of *S.*  
494 *parasanguinis* through alginate production (23) and the growth of *Streptococcus* spp.  
495 via a currently undescribed mechanisms (15, 17, 22). Conversely, previous studies  
496 investigating interactions between *P. aeruginosa* and *Streptococcus* spp. also showed  
497 that *Streptococcus* spp. influences transcription of *P. aeruginosa* virulence genes,  
498 including rhamnolipids, elastase, and phenazine biosynthesis genes through AI-2  
499 signaling (16) and an undescribed mechanism (15, 17, 18), and can suppress *P.*  
500 *aeruginosa* growth when they are a primary colonizer through production of H<sub>2</sub>O<sub>2</sub>(15,  
501 20) and reactive nitrogenous intermediates (20, 21). Thus, this polymicrobial interaction  
502 is complex.

503 Our data also indicate that *P. aeruginosa* can promote the growth of various  
504 *Streptococcus* spp., but we do not understand the basis of this growth promotion. We  
505 anticipated that the genetic screen described here would likely identify components of  
506 such a growth-promoting pathway in *P. aeruginosa*; instead, our screen only identified a  
507 single locus apparently involved in a competitive interaction. We suggest two possible  
508 explanations for our findings. First, perhaps *P. aeruginosa* determinants that promote  
509 *Streptococcus* growth are essential; we think this explanation unlikely, but a formal  
510 possibility. More likely is that *P. aeruginosa* has multiple, redundant pathways to boost  
511 *Streptococcus* growth. Thus, our genetic approach would be expected to fail to identify  
512 such redundant pathways, and alternative strategies to explore *P. aeruginosa*-  
513 *Streptococcus* interactions must be employed in future studies.

514 Finally, the observations we present here may be of relevance in the CF lung, as  
515 many patients are co-colonized by *P. aeruginosa* and *Streptococcus* spp. (9, 55).

516 Analysis of the average available iron in the airway varies markedly between  $\sim 0.02 \mu\text{M}$   
517 in healthy individuals and  $\sim 8 \mu\text{M}$  in patients with CF, and there is a great deal of  
518 variability within patients with CF (56, 57). The increased iron in the CF airway is likely  
519 due to the reported enhanced levels of extracellular iron in the apical surface liquid of  
520 airway cells with a mutation in CFTR (58) and the bleeding into the airway (hemoptysis)  
521 associated with this patient population (59). Thus, in CF patients, iron levels in the  
522 airway can range from concentrations wherein we might expect direct competition  
523 between *P. aeruginosa* and *Streptococcus* for this limited resource, to levels wherein  
524 abundant iron would mitigate such competition. Additional studies are necessary to  
525 determine if *Streptococcus* spp. are iron limited (or not) in the CF airway, or in  
526 sufficiently close proximity to *P. aeruginosa* in the airway (i.e., in mixed microcolonies)  
527 to expect direct competition for iron in a local niche.

528

529 **Acknowledgements.** We thank Dr. Ping Xu for providing his *S. sanguinis* SK36 mutant  
530 library, and Dr. Deborah Hogan, Dr. Nicholas Jacobs, and Dr. Dominique Limoli for  
531 providing bacterial strains. We thank Dr. Brian Jackson for quantifying the iron  
532 concentration in our media with ICP/MS. This work was supported by the Cystic Fibrosis  
533 Foundation (OTOOLE16GO), Molecular and Cellular Biology at Dartmouth training  
534 grant (T32GM008704), the Munck-Pfefferkorn Fund, and NIH (R37 AI83256-06) to  
535 G.A.O.

536 **Materials and Methods**

537

538 **Bacterial strains and growth conditions.** Strains used in this study are listed in  
539 Supplemental Table S3. *P. aeruginosa* strains were grown on lysogeny broth (LB) agar  
540 or in LB liquid with shaking at 37°C, and where indicated, in the presence of antibiotics  
541 at the following concentrations: 25µg/ml gentamicin, 250µg/ml kanamycin, 75µg/ml  
542 tetracycline. *Streptococcus* spp. were grown as previously described (22) on tryptic soy  
543 agar supplemented with 5% defibrinated sheep's blood (blood agar) or statically in Todd  
544 Hewitt broth supplemented with 0.5% yeast extract (THY) and 20µl/ml oxyrase  
545 (Oxyrase, Inc.) at 37°C with 5% CO<sub>2</sub>. *S. sanguinis* SK36 gene replacement mutant  
546 strains were grown on blood agar or THY with 500µg/ml kanamycin (27). At the end of  
547 each coculture assay, *P. aeruginosa* was grown overnight on *Pseudomonas* Isolation  
548 agar (PIA) at 37°C, and *Streptococcus* spp. were grown overnight on blood agar at 37°C  
549 anaerobically in AnaeroPak-Anaero containers (Thermo Fisher) or on blood agar  
550 supplemented with 10µg/ml neomycin and 10µg/ml polymixin B (*Streptococcus*  
551 selection agar) when specified. *Saccharomyces cerevisiae* strain InvSc1 (Invitrogen),  
552 was used for homologous recombination to build the pMQ30-*katA*, pMQ-30-*katB*, and  
553 pMQ30-*dbpA* deletion vector and pMQ72-*pqsL* complementation vector. InvSc1 was  
554 grown as previously described in 1% Bacto yeast extract, 2% Bacto peptone, and 2%  
555 dextrose (60). Synthetic defined agar-uracil (4813-065;Qbiogene) was used for InvSc1  
556 selections.

557

558 **Species identification of *Streptococci*.** *Streptococci* were isolated at the Dartmouth  
559 Hitchcock Medical Center in Lebanon, NH. *Streptococcus* clinical isolates were  
560 speciated using 16S rRNA gene sequencing. Genomic DNA (gDNA) was extracted  
561 from each strain from overnight cultures using the Gentra Puregene Yeast/Bact. Kit  
562 (QIAGEN) followed with 16S-ITS PCR as previously described (61) using the Strep16S-  
563 1471F and 6R-IGS primers (listed in Table S4). *Streptococcus oralis*, *S. mitis*, and *S.*  
564 *pneumoniae* were further differentiated by PCR of a region of the *gdh* gene and  
565 sequencing as previously described using the Strep-gdhF and Strep-gdhR primers  
566 (listed in Table S4) (61). The Phusion Polymerase PCR protocol (New England Biolabs)  
567 was followed for preparing 50 $\mu$ l reactions, and the PCR conditions for the 16S-ITS  
568 region were: 98 $^{\circ}$ C for 30s followed by 25 cycles of 98 $^{\circ}$ C for 10s, 61 $^{\circ}$ C for 15s, 72 $^{\circ}$ C for  
569 30s, a final extension at 72 $^{\circ}$ C for 7 minutes. The PCR conditions for amplifying *gdh*  
570 were as follows: 98 $^{\circ}$ C for 30s, followed by 30 cycles of 98 $^{\circ}$ C for 10s, 57.9 $^{\circ}$ C for 15s,  
571 72 $^{\circ}$ C for 30s followed by a final extension at 72 $^{\circ}$ C for 7 minutes. The resulting PCR  
572 products were imaged on a 1% agarose gel with Sybr Safe (Thermo Fisher Scientific  
573 Inc.). The remaining PCR reaction was purified using the QIAquick PCR Purification kit  
574 (QIAGEN), and the purified DNA product was sequenced at the Dartmouth Molecular  
575 Biology Core Facility using the Applied Biosystems 3730 DNA Analyzer. Sequence  
576 results were analyzed using NCBI BLAST for species identification.

577

578 **Mixed microbial coculture system.** Cocultures were conducted as previously  
579 described in the CFBE model system (3, 22, 35, 36) with some modifications. Overnight  
580 cultures of *P. aeruginosa* and *Streptococcus* spp. were individually centrifuged at

581 10,000 x *g* for 3 minutes, the cell pellet was washed with 1.5 ml minimal essential  
582 medium (MEM) supplemented with 2 mM L-glutamine (MEM+L-Gln), centrifuged again,  
583 and the cell pellet was resuspended in 1.5 ml MEM+L-Gln. The optical density at 600nm  
584 (OD<sub>600</sub>) of each culture was determined and the *P. aeruginosa* cultures were adjusted in  
585 MEM+L-Gln to an OD<sub>600</sub> of 0.05. The *Streptococcus* spp. cultures were adjusted to an  
586 OD<sub>600</sub> of 0.1. *S. sanguinis* SK36 overnight cultures were adjusted to an OD<sub>600</sub> of 0.1,  
587 then further diluted 1:100 in MEM+L-Gln due to the robust growth *S. sanguinis* SK36  
588 exhibits in monoculture. A 1:1 mixture of *P. aeruginosa* and *Streptococcus* spp. was  
589 prepared from the adjusted cultures. Three wells of a 96-well plate were inoculated per  
590 monoculture and coculture condition with 100uL per well. The culture plates were then  
591 incubated statically for 1 hour at 37°C with 5% CO<sub>2</sub>, at which point the unattached  
592 planktonic cells were aspirated with a multichannel pipette and replaced with 100μl  
593 MEM supplemented with 2mM L-glutamine and 0.4% L-arginine (MEM+L-Gln+L-Arg).  
594 The culture plates were incubated statically for an additional 5.5 hours, at which point  
595 the supernatant was removed and replaced with 100μl MEM+L-Gln+L-Arg. At 21 hours  
596 post-inoculation, planktonic cells were removed to be plated and biofilms were disrupted  
597 using a 96 pin replicator in 100μl of MEM+L-Gln. Both planktonic and biofilm cells were  
598 10-fold serially diluted and plated on selective media. PIA plates were grown overnight  
599 aerobically, and blood agar plates were grown overnight in AnaeroPak-Anaero  
600 containers (Thermo Scientific) with GasPak satchets (BD) to selectively grow *P.*  
601 *aeruginosa* and *Streptococcus* spp., respectively. Following overnight incubation,  
602 colonies were counted and the colony forming units (CFU) per milliliter of culture were  
603 determined.

604

605 **Growth kinetics in mixed microbial coculture system.** *P. aeruginosa* PA14 and  
606 PAO1 were grown in coculture with *S. sanguinis* SK36 as described above, with one 96-  
607 well plate per time point. Six time points were assessed: 0, 3, 5.5, 7.5, 10, and 24 hours.  
608 The 0-hour time point corresponds to the initial inoculum. At each time point, the  
609 planktonic and biofilm cells from the same wells were serially diluted and plated on PIA  
610 and blood agar. Cells were harvested from the 5.5 hour time point plate prior to the 5.5  
611 hour medium exchange.

612

613 **Construction of *P. aeruginosa* PA14 deletion mutant strains.** The pMQ30 vector  
614 (Table S3) was used to generate the *P. aeruginosa* PA14  $\Delta katA$ ,  $\Delta katB$ ,  $\Delta katA\Delta katB$ ,  
615 and  $\Delta dbpA$  mutant strains. The pMQ30-*katA*, pMQ30-*katB*, and pMQ30-*dbpA* deletion  
616 constructs were built using homologous recombination of the PCR products made with  
617 the respective “KO” primers (listed in Table S4) with the Xba1 restriction enzyme-  
618 digested pMQ30 in yeast as previously reported (60). Plasmid integrants were isolated  
619 on LB agar supplemented with gentamicin and nalidixic acid followed by  
620 counterselection on sucrose medium. Deletion mutants were confirmed by PCR with  
621 respective “conf.” primers (Table S4), followed by sequencing. Coculture was conducted  
622 as described above with the confirmed *P. aeruginosa* PA14 deletion mutant strains.

623

624 **Genetic screen.** The Ausubel lab created a nonredundant *P. aeruginosa* PA14  
625 transposon library (PA14NR set) in 96-well plate format (43). Initially, a 96 pin replicator  
626 was used to transfer inocula from the frozen library to a sterile 96-well plate containing

627 150µl of LB per well. The plate was then incubated statically for 24 hours at 37°C. *S.*  
628 *constellatus* 7155 frozen aliquots were made from 750µl of overnight culture mixed with  
629 750µl of 40% glycerol. The day of the coculture experiment, frozen *S. constellatus* 7155  
630 aliquots were thawed and 500µl of aliquot were added to 4.5ml THY cultures with 100µl  
631 Oxyrase, and were grown for 6-8h at 37°C with 5% CO<sub>2</sub>. The *S. constellatus* 7155  
632 culture was then adjusted to an OD<sub>600</sub> of 0.05 in MEM+L-Gln, and 100µl of adjusted  
633 culture were added to each well of a sterile 96-well plate. The PA14NR set was grown  
634 in LB for 24 hr in a 96 well plate format - each well contained a transposon mutant from  
635 the *P. aeruginosa* PA14NR set. A 96 pin replicator was then used to transfer 2-3µl of  
636 culture from the transposon library plate into the plate containing *S. constellatus* 7155.  
637 The coculture plates were then incubated statically for 2 hours at 37°C with 5% CO<sub>2</sub>.  
638 After 2 hours, the supernatant and unattached bacteria were aspirated using a  
639 multichannel pipette and 100µl MEM+L-Gln with 5µg/ml tobramycin to suppress *P.*  
640 *aeruginosa* PA14 rhamnolipid production were added to each well. The plates were  
641 then incubated statically for an additional 20 hours at 37°C with 5% CO<sub>2</sub>. At 22 hours  
642 post-inoculation, the 96 pin replicator was used to disrupt the biofilms into the  
643 supernatant fraction. The 96 pin replicator was then used to spot culture onto large petri  
644 plates containing either PIA or *Streptococcus* selection agar. PIA plates were incubated  
645 overnight at 37°C, and *Streptococcus* selection agar plates were incubated for 24 hours  
646 at 37°C with 5% CO<sub>2</sub>. In the initial screen, we identified *P. aeruginosa* mutants that  
647 showed low or undetectable *S. constellatus* 7155 growth. To confirm the phenotype, the  
648 candidate *P. aeruginosa* PA14 transposon mutant strain was picked from the PIA plate  
649 and grown statically overnight at 37°C in a sterile 96-well plate in 125µl LB. The next



650 morning, 125 $\mu$ l of 40% glycerol was added to each well containing *P. aeruginosa* PA14  
651 candidate mutants, and these “candidate mutant” plates were stored at -80°C for the  
652 next round of screening. For the second round of the screen, the coculture process  
653 described above was repeated with the plates containing candidate mutants.

654 If we had clean deletions of the candidate mutants, they were also tested in the  
655 assay above. If the clean deletion did not recapitulate the original transposon mutant,  
656 that transposon mutant was eliminated from the list of candidate mutants. Table S2  
657 shows the final list of *P. aeruginosa* PA14 transposon insertion mutant strains that  
658 yielded low or undetectable *S. constellatus* 7155 growth after rescreening.

659 We then tested each individual *P. aeruginosa* PA14 transposon mutant in Table  
660 S2 in our standard 96-well coculture assay as described above with *S. sanguinis* SK36.  
661 The two mutants that yielded consistently low *S. sanguinis* SK36 growth in our standard  
662 coculture are in bold in Table S2.

663

664 ***P. aeruginosa*  $\Delta$ pqsL complementation.** The pMQ72 vector (Table S3) with an  
665 arabinose-inducible promoter was used to complement the *P. aeruginosa* PA14  $\Delta$ pqsL  
666 deletion mutant. The pMQ72-pqsL complementation plasmid was built using  
667 homologous recombination of the PCR product made with the pqsL comp 3' and pqsL  
668 comp 5' primers (listed in Table S4) with SacI restriction enzyme-digested pMQ72 in  
669 yeast as previously reported (60). *P. aeruginosa* PA14  $\Delta$ pqsL/pMQ72-pqsL and *P.*  
670 *aeruginosa* PA14  $\Delta$ pqsL/pMQ72-empty vector control strains were cocultured with *S.*  
671 *sanguinis* SK36 as described above with the following changes: at 1 and 5.5h post-



672 inoculation, MEM+L-Gln+L-Arg supplemented with L-arabinose at 0% and 0.2% final  
673 concentration was added to the medium to induce pMQ72-*pqsL* gene expression.

674

675 **Coculture with 50 $\mu$ M ferric chloride.** Coculture was conducted as described above,  
676 but with the following changes: at 1 and 5.5 hours post-inoculation, supernatants were  
677 aspirated with a multichannel pipette, and replaced with MEM+L-Gln+L-Arg, with or  
678 without freshly prepared, filter sterilized 50 $\mu$ M ferric chloride hexahydrate.

679

680 **Anaerobic coculture.** Coculture was conducted as described above, but with the  
681 following alterations: once the plates were inoculated, they were incubated in  
682 AnaeroPak-Anaero containers with a GasPak satchet. At each medium change (1 hour,  
683 5.5 hours), a new satchet was added to the container to ensure anaerobic coculture  
684 conditions. The AnaeroPak container was incubated in the same incubator as the  
685 aerobic plate to control for any environmental effects.

686 **Literature Cited**

- 687 1. Riordan, Rommens J, Kerem B, Alon N, Rozmahel R, Grzelczak Z, Zielenski J,  
688 Lok S, Plavsic N, Chou J-L, Et A. 1989. Identification of the cystic fibrosis gene:  
689 cloning and characterization of complementary DNA. *Science* 245:1066–1073.
- 690 2. Elborn JS. 2016. Cystic fibrosis. *Lancet* 388:2519–2531.
- 691 3. Orazi G, O'Toole GA. 2017. *Pseudomonas aeruginosa* alters *Staphylococcus*  
692 *aureus* sensitivity to vancomycin in a biofilm model of cystic fibrosis infection.  
693 *MBio* 8:1–17.
- 694 4. Tavernier S, Crabbe A, Hacıoglu M, Stuer L, Henry S, Rigole P, Dhondt I, Coenye  
695 T. 2017. Community composition determines activity of antibiotics against  
696 multispecies biofilms. *Antimicrob Agents Chemother* 61:1–12.
- 697 5. Parkins MD, Sibley CD, Surette MG, Rabin HR. 2008. The *Streptococcus milleri*  
698 group - An unrecognized cause of disease in cystic fibrosis: A Case Series and  
699 Literature Review. *Pediatr Pulmonol* 43:490–497.
- 700 6. Sibley CD, Grinwis ME, Field TR, Parkins MD, Norgaard JC, Gregson DB, Rabin  
701 HR, Surette MG. 2010. McKay agar enables routine quantification of the  
702 “*Streptococcus milleri*” group in cystic fibrosis patients. *J Med Microbiol* 59:534–  
703 540.
- 704 7. Cade A, Denton M, Brownlee KG, Todd N, Conway SP. 1999. Acute  
705 bronchopulmonary infection due to *Streptococcus milleri* in a child with cystic  
706 fibrosis. *Arch Dis Child* 80:278–9.
- 707 8. Sibley CD, Parkins MD, Rabin HR, Duan K, Norgaard JC, Surette MG. 2008. A  
708 polymicrobial perspective of pulmonary infections exposes an enigmatic pathogen

- 709 in cystic fibrosis patients. *Proc Natl Acad Sci* 105:15070–15075.
- 710 9. Filkins LM, Hampton TH, Gifford AH, Gross MJ, Hogan DA, Sogin ML, Morrison  
711 HG, Paster BJ, O'Toole GA. 2012. Prevalence of *Streptococci* and increased  
712 polymicrobial diversity associated with cystic fibrosis patient stability. *J Bacteriol*  
713 194:4709–4717.
- 714 10. Flight WG, Smith A, Paisey C, Marchesi JR, Bull MJ, Norville PJ, Mutton KJ,  
715 Webb AK, Bright-Thomas RJ, Jones AM, Mahenthiralingam E. 2015. Rapid  
716 detection of emerging pathogens and loss of microbial diversity associated with  
717 severe lung disease in cystic fibrosis. *J Clin Microbiol* 53:2022–2029.
- 718 11. O'Toole GA. 2017. Cystic fibrosis airway microbiome: Overturning the old,  
719 opening the way for the new. *J Bacteriol* 200:1–8.
- 720 12. Marshall, B.; Elbert, A.; Petren, K.; Rizvi, S.; Fink, A.; Ostrenga, J.; Sewall, A.;  
721 Loeffler D. 2016. Patient Registry: Annual Data Report 2015. *Cyst Fibros Found*  
722 *Patient Regist* 1–94.
- 723 13. Rudkjøbing VB, Thomsen TR, Alhede M, Kragh KN, Nielsen PH, Johansen UR,  
724 Givskov M, Høiby N, Bjarnsholt T. 2012. The microorganisms in chronically  
725 infected end-stage and non-end-stage cystic fibrosis patients. *FEMS Immunol*  
726 *Med Microbiol* 65:236–244.
- 727 14. Hogan DA, Willger SD, Dolben EL, Hampton TH, Stanton BA, Morrison HG, Sogin  
728 ML, Czum J, Ashare A. 2016. Analysis of lung microbiota in bronchoalveolar  
729 lavage, protected brush and sputum samples from subjects with mild-to-moderate  
730 cystic fibrosis lung disease. *PLoS One* 11:e0149998.
- 731 15. Whiley RA, Fleming E V., Makhija R, Waite RD. 2015. Environment and

- 732 colonisation sequence are key parameters driving cooperation and competition  
733 between *Pseudomonas aeruginosa* cystic fibrosis strains and oral commensal  
734 streptococci. *PLoS One* 10:1–14.
- 735 16. Duan K, Dammel C, Stein J, Rabin H, Surette MG. 2003. Modulation of  
736 *Pseudomonas aeruginosa* gene expression by host microflora through  
737 interspecies communication. *Mol Microbiol* 50:1477–1491.
- 738 17. Whiley RA, Sheikh NP, Mushtaq N, Hagi-pavli E, Personne Y, Javaid D, Waite  
739 RD. 2014. Differential potentiation of the virulence of the *Pseudomonas*  
740 *aeruginosa* cystic fibrosis liverpool epidemic strain by oral commensal  
741 *Streptococci*. *J Infect Dis* 209:769–780.
- 742 18. Sibley CD, Duan K, Fischer C, Parkins MD, Storey DG, Rabin HR, Surette MG.  
743 2008. Discerning the complexity of community interactions using a *drosophila*  
744 model of polymicrobial infections. *PLoS Pathog* 4:e1000184.
- 745 19. Waite RD, Qureshi MR, Whiley RA. 2017. Modulation of behaviour and virulence  
746 of a high alginate expressing *Pseudomonas aeruginosa* strain from cystic fibrosis  
747 by oral commensal bacterium *Streptococcus anginosus*. *PLoS One* 12:e0173741.
- 748 20. Scoffield JA, Wu H. 2015. Oral *Streptococci* and nitrite-mediated interference of  
749 *Pseudomonas aeruginosa*. *Infect Immun* 83:101–107.
- 750 21. Scoffield JA, Wu H. 2016. Nitrite reductase is critical for *Pseudomonas*  
751 *aeruginosa* survival during co-infection with the oral commensal *Streptococcus*  
752 *parasanguinis*. *Microbiology* 162:376–383.
- 753 22. Price KE, Naimie AA, Griffin EF, Bay C, O’Toole GA. 2016. Tobramycin-treated  
754 *Pseudomonas aeruginosa* PA14 enhances *Streptococcus constellatus* 7155

- 755 biofilm formation in a cystic fibrosis model system. *J Bacteriol* 198:237–247.
- 756 23. Scoffield JA, Duan D, Zhu F, Wu H. 2017. A commensal *streptococcus* hijacks a  
757 *Pseudomonas aeruginosa* exopolysaccharide to promote biofilm formation. *PLOS*  
758 *Pathog* 13:e1006300.
- 759 24. Xu P, Alves JM, Kitten T, Brown A, Chen Z, Ozaki LS, Manque P, Ge X, Serrano  
760 MG, Puiu D, Hendricks S, Wang Y, Chaplin MD, Akan D, Paik S, Peterson DL,  
761 Macrina FL, Buck GA. 2007. Genome of the opportunistic pathogen  
762 *Streptococcus sanguinis*. *J Bacteriol* 189:3166–3175.
- 763 25. Stover CK, Pham XQ, Erwin AL, Mizoguchi SD, Warrener P, Hickey MJ,  
764 Brinkman FSL, Hufnagle WO, Kowalik DJ, Lagrou M, Garber RL, Goltry L,  
765 Tolentino E, Westbrook-Wadman S, Yuan Y, Brody LL, Coulter SN, Folger KR,  
766 Kas A, Larbig K, Lim R, Smith K, Spencer D, Wong GK-S, Wu Z, Paulsen IT,  
767 Reizer J, Saier MH, Hancock REW, Lory S, Olson M V. 2000. Complete genome  
768 sequence of *Pseudomonas aeruginosa* PAO1, an opportunistic pathogen. *Nature*  
769 406:959–964.
- 770 26. Winsor GL, Van Rossum T, Lo R, Khaira B, Whiteside MD, Hancock REW,  
771 Brinkman FSL. 2009. *Pseudomonas* Genome Database: facilitating user-friendly,  
772 comprehensive comparisons of microbial genomes. *Nucleic Acids Res Acids Res*  
773 37:483–488.
- 774 27. Xu P, Ge X, Chen L, Wang X, Dou Y, Xu JZ, Patel JR, Stone V, Trinh M, Evans  
775 K, Kitten T, Bonchev D, Buck GA. 2011. Genome-wide essential gene  
776 identification in *Streptococcus sanguinis*. *Sci Rep* 1:1–9.
- 777 28. Chen L, Ge X, Xu P. 2015. Identifying Essential *Streptococcus sanguinis* genes

- 778 using genome-wide deletion mutation. *Methods Mol Biol* 1279:15–23.
- 779 29. Jacobs MA, Alwood A, Thaipisuttikul I, Spencer D, Haugen E, Ernst S, Will O,  
780 Kaul R, Raymond C, Levy R, Chun-Rong L, Guenther D, Bovee D, Olson M V,  
781 Manoil C. 2003. Comprehensive transposon mutant library of *Pseudomonas*  
782 *aeruginosa*. *Proc Natl Acad Sci* 100:14339–14344.
- 783 30. Sibley CD, Sibley KA, Leong TA, Grinwis ME, Parkins MD, Rabin HR, Surette  
784 MG. 2010. The *Streptococcus milleri* population of a cystic fibrosis clinic reveals  
785 patient specificity and intraspecies diversity. *J Clin Microbiol* 48:2592–2594.
- 786 31. Maeda Y, Elborn JS, Parkins MD, Reihill J, Goldsmith CE, Coulter WA, Mason C,  
787 Millar BC, Dooley JSG, Lowery CJ, Ennis M, Rendall JC, Moore JE. 2011.  
788 Population structure and characterization of Viridans Group *Streptococci* (VGS)  
789 including *Streptococcus pneumoniae* isolated from adult patients with cystic  
790 fibrosis (CF). *J Cyst Fibros* 10:133–139.
- 791 32. Toyofuku M, Nakajima-Kambe T, Uchiyama H, Nomura N. 2010. The Effect of a  
792 cell-to-cell communication molecule, *Pseudomonas* Quinolone Signal (PQS),  
793 produced by *P. aeruginosa* on other bacterial species. *Microbes Environ* 25:1–7.
- 794 33. Morales DK, Grahl N, Okegbe C, Dietrich LEP, Jacobs NJ, Hogan DA. 2013.  
795 Control of *candida albicans* metabolism and biofilm formation by *Pseudomonas*  
796 *aeruginosa* phenazines. *MBio* 4:e00526-12.
- 797 34. Chen AI, Dolben EF, Okegbe C, Harty CE, Golub Y, Thao S, Ha DG, Willger SD,  
798 O'Toole GA, Harwood CS, Dietrich LEP, Hogan DA. 2014. *Candida albicans*  
799 ethanol stimulates *Pseudomonas aeruginosa* WspR-controlled biofilm formation  
800 as part of a cyclic relationship involving phenazines. *PLoS Pathog* 10:e1004480.

- 801 35. Filkins LM, Graber JA, Olson DG, Dolben EL, Lynd LR, Bhujra S, O'Toole GA.  
802 2015. Coculture of *Staphylococcus aureus* with *Pseudomonas aeruginosa* drives  
803 *S. aureus* towards fermentative metabolism and reduced viability in a cystic  
804 fibrosis model. *J Bacteriol* 197:2252–2264.
- 805 36. Limoli DH, Whitfield GB, Kitao T, Ivey ML, Davis MRJ, Grahl N, Hogan DA,  
806 Rahme LG, Howell PL, O'Toole GA, Goldberg JB. 2017. *Pseudomonas*  
807 *aeruginosa* alginate overproduction promotes coexistence with *Staphylococcus*  
808 *aureus* in a model of cystic fibrosis respiratory infection. *MBio* 8:e00186-17.
- 809 37. Brown SM, Howell ML, Vasil ML, Anderson AJ, Hassett DJ. 1995. Cloning and  
810 characterization of the *katB* gene of *Pseudomonas aeruginosa* encoding a  
811 hydrogen peroxide-inducible catalase: purification of KatB, cellular localization,  
812 and demonstration that it is essential for optimal resistance to hydrogen peroxide.  
813 *J Bacteriol* 177:6536–6544.
- 814 38. Malhotra S, Limoli DH, English AE, Parsek MR, Wozniak DJ. 2018. Mixed  
815 communities of mucoid and nonmucoid *Pseudomonas aeruginosa* exhibit  
816 enhanced resistance to host antimicrobials. *MBio* 9:e00275-18.
- 817 39. Hassett DJ, Alsabbagh E, Parvatiyar K, Howell ML, Wilmott RW, Ochsner UA.  
818 2000. A protease-resistant catalase, KatA, released upon cell lysis during  
819 stationary phase is essential for aerobic survival of a *Pseudomonas aeruginosa*  
820 *oxyR* mutant at low cell densities. *J Bacteriol* 182:4557–4563.
- 821 40. Zhu L, Kreth J. 2012. The role of hydrogen peroxide in environmental adaptation  
822 of oral microbial communities. *Oxid Med Cell Longev* 2012:1–10.
- 823 41. Jakubovics NS, Yassin SA, Rickard AH. 2014. Community interactions of oral

- 824           *Streptococci*, p. 43–110. In Sariaslani, S, Gadd, GMBT-A in AM (eds.), *Advances*  
825           *in Applied Microbiology*. Academic Press.
- 826   42.   Lee J, Heo Y, Lee JK, Cho Y. 2005. KatA, the major catalase, is critical for  
827           osmoprotection and virulence in *Pseudomonas aeruginosa* PA14. *Infect Immun*  
828           73:4399–4403.
- 829   43.   Liberati NT, Urbach JM, Miyata S, Lee DG, Drenkard E, Wu G, Villanueva J, Wei  
830           T, Ausubel FM. 2006. An ordered, nonredundant library of *Pseudomonas*  
831           *aeruginosa* strain PA14 transposon insertion mutants. *Proc Natl Acad Sci*  
832           103:2833–2838.
- 833   44.   Shajani Z, Sykes MT, Williamson JR. 2011. Assembly of bacterial ribosomes.  
834           *Annu Rev Biochem* 80:501–526.
- 835   45.   Gentry RC, Childs JJ, Gevorkyan J, Gerasimova Y V., Koculi E. 2016. Time  
836           course of large ribosomal subunit assembly in *E. coli* cells overexpressing a  
837           helicase inactive DbpA protein. *RNA* 22:1055–1064.
- 838   46.   Gallagher LA, McKnight SL, Kuznetsova MS, Pesci EC, Manoil C. 2002.  
839           Functions required for extracellular quinolone signaling by *Pseudomonas*  
840           *aeruginosa*. *J Bacteriol* 184:6472–6480.
- 841   47.   Argenio DAD, Calfee MW, Rainey PB, Pesci EC. 2002. Autolysis and  
842           autoaggregation in *Pseudomonas aeruginosa* colony morphology mutants. *J*  
843           *Bacteriol* 184:6481–6489.
- 844   48.   Pesci EC, Milbank JBJ, Pearson JP, McKnight S, Kende AS, Greenberg EP,  
845           Iglewski BH. 1999. Quinolone signaling in the cell-to-cell communication system  
846           of *Pseudomonas aeruginosa*. *Proc Natl Acad Sci* 96:11229–11234.



- 847 49. Maura D, Hazan R, Kitao T, Ballok AE, Rahme LG. 2016. Evidence for direct  
848 control of virulence and defense gene circuits by the *Pseudomonas aeruginosa*  
849 quorum sensing regulator, MvfR. *Sci Rpt Gr* 6:1–14.
- 850 50. Wade DS, Calfee MW, Rocha ER, Ling EA, Engstrom E, Coleman JP, Pesci EC.  
851 2005. Regulation of *Pseudomonas* quinolone signal synthesis in *Pseudomonas*  
852 *aeruginosa*. *J Bacteriol* 187:4372–4380.
- 853 51. Rampioni G, Falcone M, Heeb S, Frangipani E, Fletcher MP, Dubern J-F, Visca  
854 P, Leoni L, Camara M, Williams P. 2016. Unravelling the genome-wide  
855 contributions of specific 2-Alkyl-4-Quinolones and PqsE to quorum sensing in  
856 *Pseudomonas aeruginosa*. *PLOS Pathog* 12:e1006029.
- 857 52. Diggle SP, Matthijs S, Wright VJ, Fletcher MP, Chhabra SR, Lamont IL, Kong X,  
858 Hider RC, Cornelis P, Cámara M, Williams P. 2007. The *Pseudomonas*  
859 *aeruginosa* 4-quinolone signal molecules HHQ and PQS play multifunctional roles  
860 in quorum sensing and iron entrapment. *Chem Biol* 14:87–96.
- 861 53. Bredenbruch F, Geffers R, Nimtz M, Buer J, Häussler S. 2006. The *Pseudomonas*  
862 *aeruginosa* quinolone signal (PQS) has an iron-chelating activity. *Environ*  
863 *Microbiol* 8:1318–1329.
- 864 54. Sønderholm M, Kragh KN, Koren K, Jakobsen TH, Darch SE, Alhede M, Jensen  
865 PØ, Whiteley M, Kühl M, Bjarnsholt T. 2017. *Pseudomonas aeruginosa* aggregate  
866 formation in an alginate bead model system exhibits *in vivo*-like characteristics.  
867 *Appl Environ Microbiol* 83:e00113-17.
- 868 55. Filkins LM, O'Toole GA. 2015. Cystic fibrosis lung infections: Polymicrobial,  
869 complex, and hard to treat. *PLoS Pathog* 11:e1005258.

- 870 56. Stites SW, Walters B, O'Brien-Ladner AR, Bailey K, Wesselius LJ. 1998.  
871 Increased iron and ferritin content of sputum from patients with cystic fibrosis or  
872 chronic bronchitis. *Chest* 114:814–819.
- 873 57. Stites SW, Plautz MW, Bailey K, O'Brien-Ladner AR, Wesselius LJ. 1999.  
874 Increased concentrations of iron and isoferitins in the lower respiratory tract of  
875 patients with stable cystic fibrosis. *Am J Respir Crit Care Med* 160:796–801.
- 876 58. Moreau-Marquis S, Bomberger JM, Anderson GG, Swiatecka-Urban A, Ye S,  
877 O'Toole GA, Stanton BA. 2008. The F508-CFTR mutation results in increased  
878 biofilm formation by *Pseudomonas aeruginosa* by increasing iron availability. *AJP*  
879 *Lung Cell Mol Physiol* 295:L25–L37.
- 880 59. Coss-Bu JA, Sachdeva RC, Bricker JT, Harrison GM, Jefferson LS. 1997.  
881 Hemoptysis: A 10-Year retrospective study. *Pediatrics* 100:1–4.
- 882 60. Shanks RMQ, Caiazza NC, Hinsa SM, Toutain CM, O'Toole GA. 2006.  
883 *Saccharomyces cerevisiae*-based molecular tool kit for manipulation of genes  
884 from gram-negative bacteria. *Appl Environ Microbiol* 72:5027–5036.
- 885 61. Nielsen XC, Justesen US, Dargis R, Kemp M, Christensen JJ. 2009. Identification  
886 of clinically relevant nonhemolytic *Streptococci* on the basis of sequence analysis  
887 of 16S-23S intergenic spacer region and partial *gdh* Gene. *J Clin Microbiol*  
888 47:932–939.  
889

890 **Figure Legends**

891

892 **Figure 1. *P. aeruginosa* enhanced growth of *Streptococcus* spp. in coculture.** (A to

893 D) Coculture assays were conducted to investigate streptococcal growth when exposed

894 to *P. aeruginosa*. (A) *S. sanguinis* SK36 (Ss) cocultured with *P. aeruginosa* PAO1. (B)

895 Coculture growth kinetics of *S. sanguinis* with *P. aeruginosa* PA14 were investigated.

896 The time points each represent the average of three biological replicates with three

897 technical replicates. The error bars indicate SD. (C) A representative group of clinical

898 and reference *Streptococcus* strains were tested in coculture with *P. aeruginosa* PAO1

899 (see Fig. S3A for all *Streptococcus* spp. strains tested). In this panel, each strain is

900 denoted by their strain number, *S. anginosus* 5535, *S. intermedius* 4807, *S. constellatus*

901 7155, *S. parasanguinis* ATCC15912, *S. pneumoniae* D39, *S. peroris* ATCC700780, *S.*

902 *oralis* 7404, and *S. salivarius* JIM8780. (D) *S. sanguinis* SK36 was tested in coculture

903 with multiple *P. aeruginosa* clinical and laboratory strains. (A, C, D) Each column

904 represents the average of three biological replicates with three technical replicates. The

905 error bars indicate the standard deviation. ns, not significant, \*,  $P < 0.05$ , \*\*,  $P < 0.01$ ,

906 and \*\*\*,  $P < 0.001$  by paired two-tailed student's *t*-test (A and C), repeated measures

907 one-way analysis of variance (ANOVA) with Tukey's multiple comparisons posttest (D),

908 and paired two-tailed student's *t*-test between Ss + PAO1 DHL08 and Ss + PAO1

909 mucA22 (D). The corresponding graphs depicting *P. aeruginosa* growth in these assays

910 can be found in Figures S1-4.

911

912 **Figure 2. Screening for *P. aeruginosa* PA14 mutants altered in interaction with**

913 **Streptococcus.** (A) An overview of the *P. aeruginosa* PA14NR Set transposon mutant  
914 screen used to identify *P. aeruginosa* transposon insertion mutants that can no longer  
915 enhance *S. constellatus* 7155 growth, and the number of *P. aeruginosa* PA14  
916 transposon insertion mutants identified in each step. (B) Coculture between a mutant  
917 strain identified in the screen, *P. aeruginosa* *pqsL::TnM*, and *S. sanguinis* SK36. Each  
918 bar represents the average of three biological replicates, each with three technical  
919 replicates. Error bars represent SD. \*\*,  $P < 0.01$  and \*\*\*,  $P < 0.001$  by repeated  
920 measures ANOVA with Tukey's multiple comparison posttest. *P. aeruginosa* growth  
921 data from this assay can be found in Figure S7.

922

923 **Figure 3. The *P. aeruginosa*  $\Delta pqsL$  mutant inhibits *Streptococcus* growth.** (A) The  
924 PQS biosynthetic pathway and the enzymes that catalyze each step are shown. (B)  
925 Coculture of *S. sanguinis* SK36 with wild-type *P. aeruginosa* PA14 and *P. aeruginosa*  
926 PA14 mutant strains lacking each enzyme in the PQS biosynthetic pathway. (C)  
927 Coculture of *S. sanguinis* SK36 with *P. aeruginosa* PA14, the  $\Delta pqsL$  mutant, its  
928 complement pMQ72-*pqsL* and the vector control pMQ72 in the presence of 0.2%  
929 arabinose. (D) Coculture of representative *Streptococci* from Figure 1 in coculture with  
930 the WT *P. aeruginosa* PA14 and the  $\Delta pqsL$  mutant strain. In each panel, bars represent  
931 the average of three biological replicates, each with at least three technical replicates.  
932 Error bars indicate SD. ns, not significant, \*,  $P < 0.05$ , \*\*,  $P < 0.01$ , and \*\*\*,  $P < 0.001$  by  
933 repeated measures ANOVA with Dunnett's multiple comparisons posttest with  
934 *Streptococcus*-only as the control condition (B) and repeated measures ANOVA with  
935 Tukey's multiple comparisons posttest (C and D). The corresponding *P. aeruginosa*

936 growth data for these experiments can be found in Figures S8-10.

937

938 **Figure 4. *P. aeruginosa*  $\Delta pqsL$  mutant likely inhibits *Streptococcus* growth by**

939 **sequestering iron.** (A) Coculture of *S. sanguinis* SK36 with *P. aeruginosa* PA14 mutant

940 strains lacking *pqsL*, and siderophore ( $\Delta pqsLpvdApchE$ ) or phenazine genes

941 ( $\Delta pqsLphzA-G1/2$ ). (B) Coculture of *S. sanguinis* SK36 with *P. aeruginosa* PA14 mutant

942 strains in 5% CO<sub>2</sub> (aerobic) or in anaerobic conditions. (C) Coculture of *S. sanguinis*

943 SK36 gene replacement mutants lacking putative iron acquisition genes with *P.*

944 *aeruginosa* PA14 and the  $\Delta pqsL$  mutant. Each bar represents the average of three

945 biological replicates, each with at least three technical replicates. Error bars indicate

946 SD. ns, not significant, \*,  $P < 0.05$ , \*\*,  $P < 0.01$ , and \*\*\*,  $P < 0.001$  by repeated

947 measures ANOVA with Tukey's multiple comparisons posttest (A), paired two-tailed

948 student's *t*-test (B), and repeated measures ANOVA with Dunnett's multiple

949 comparisons posttest with *S. sanguinis* (Ss) as the control condition (C). The

950 corresponding *P. aeruginosa* growth data for these experiments can be found in Supp.

951 Figure S11-13.

952

953 **Figure 5. A model for *P. aeruginosa*-*Streptococcus* interactions.** (A-B) *P.*

954 *aeruginosa* has both positive and negative interactions with *Streptococcus* spp. (A) It

955 has been demonstrated previously that *P. aeruginosa* can enhance *S. parasanguinis*

956 biofilm formation through alginate secretion (23) or inhibit *Streptococcus* growth with

957 rhamnolipid secretion (22). Here we describe a negative interaction wherein iron

958 sequestration by *P. aeruginosa* limits *Streptococcus* spp. growth. *Streptococcus*

959 promoting factors produced by *P. aeruginosa* have not yet been identified (indicated by

960 the question mark). (B) Previous evidence also demonstrates that *Streptococci* can  
961 influence *P. aeruginosa* through AI-2 signaling (16), leading to enhanced *lasB*, *rhlA*,  
962 *exoT*, and *phzA1/2* gene expression, or inhibit *P. aeruginosa* viability through H<sub>2</sub>O<sub>2</sub>  
963 production (15, 20, 21) and subsequent generation of reactive nitrogenous  
964 intermediates (20, 21).

965 **Table 1: *S. sanguinis* SK36 iron-related gene products.**

| <b>Gene Number</b> | <b>Predicted Gene Product</b>                                               |
|--------------------|-----------------------------------------------------------------------------|
| Ssx_0256           | ScaR metalloregulator                                                       |
| Ssx_0686           | Fe <sup>2+</sup> /Zn <sup>2+</sup> uptake regulation protein                |
| Ssx_1129           | periplasmic iron transport lipoprotein                                      |
| Ssx_1578           | ABC-type Fe <sup>3+</sup> -siderophore transport system, permease component |
| Ssx_1581           | FatB, metal-binding ABC transporter                                         |
| Ssx_1741           | ABC-type Fe <sup>3+</sup> -siderophores transporter, ATPase component       |
| Ssx_1742           | ferrichrome-binding protein                                                 |
| Ssx_1743           | ABC-type Fe <sup>3+</sup> -siderophore transport system, permease component |
| Ssx_1744           | iron compound ABC transporter, permease protein                             |

966

Figure 1

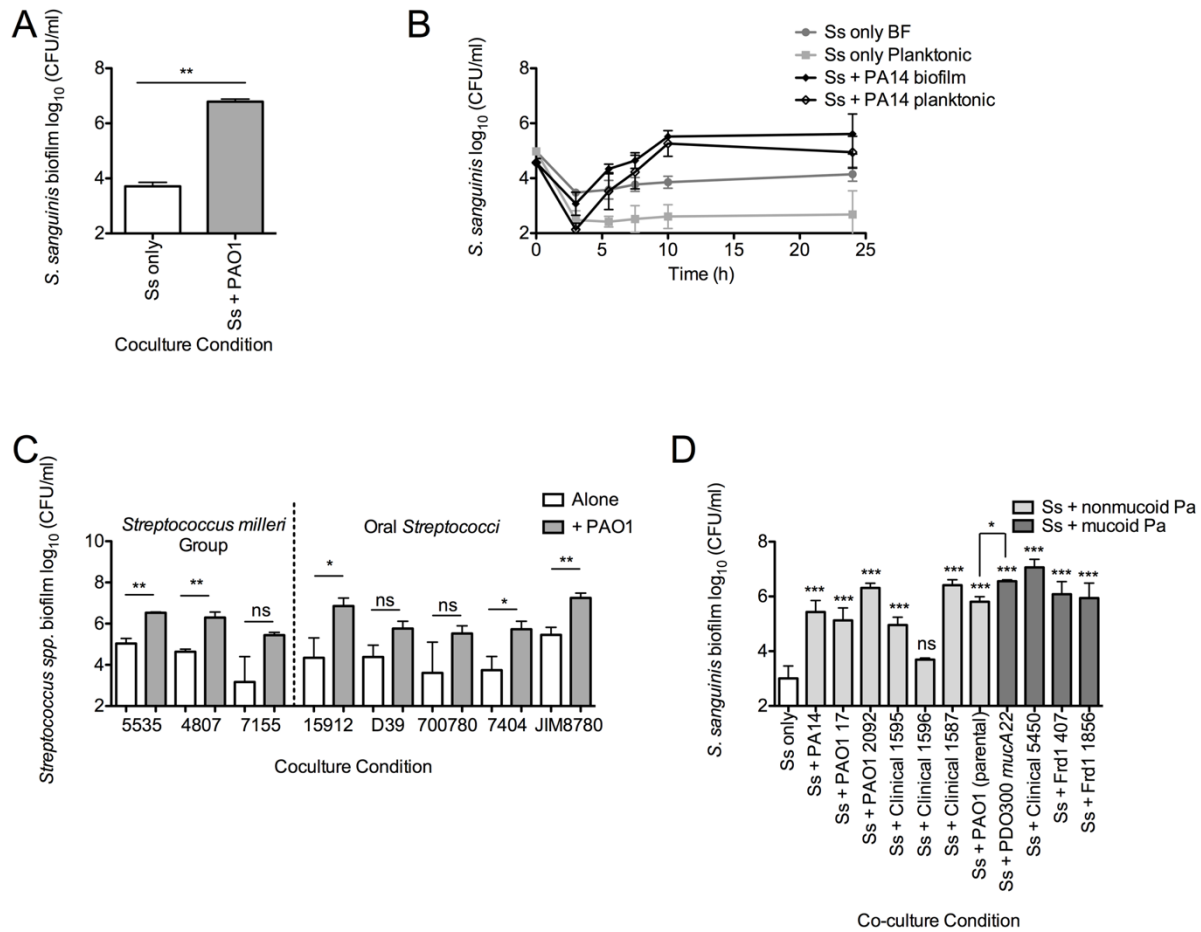



Figure 2

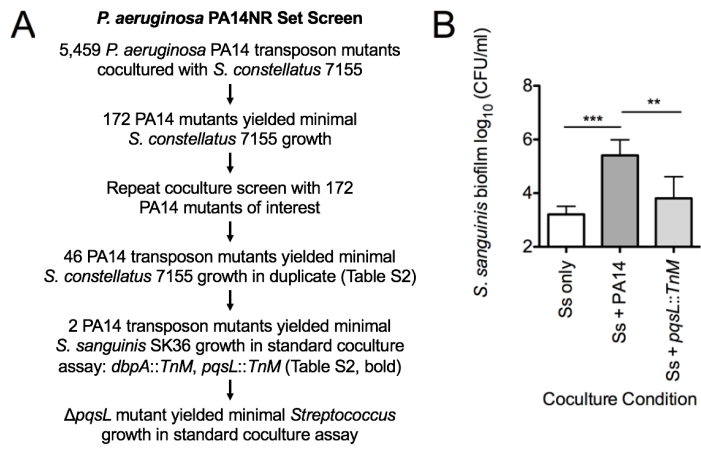

Figure 3

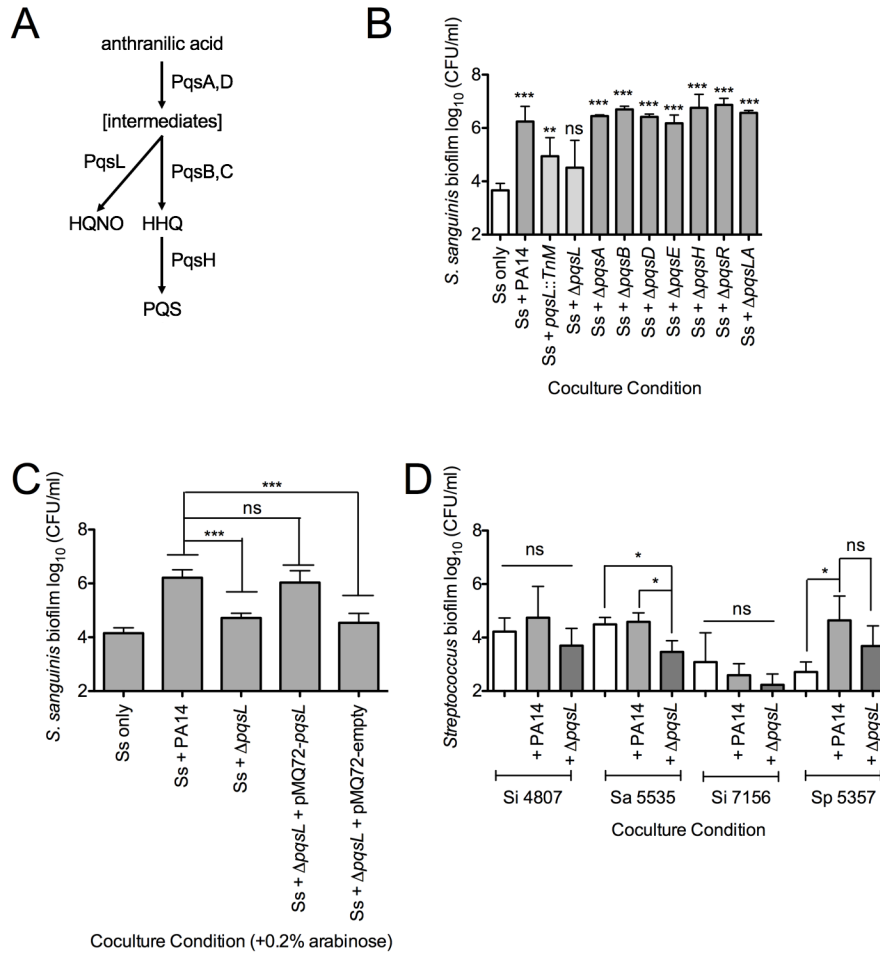

Figure 4

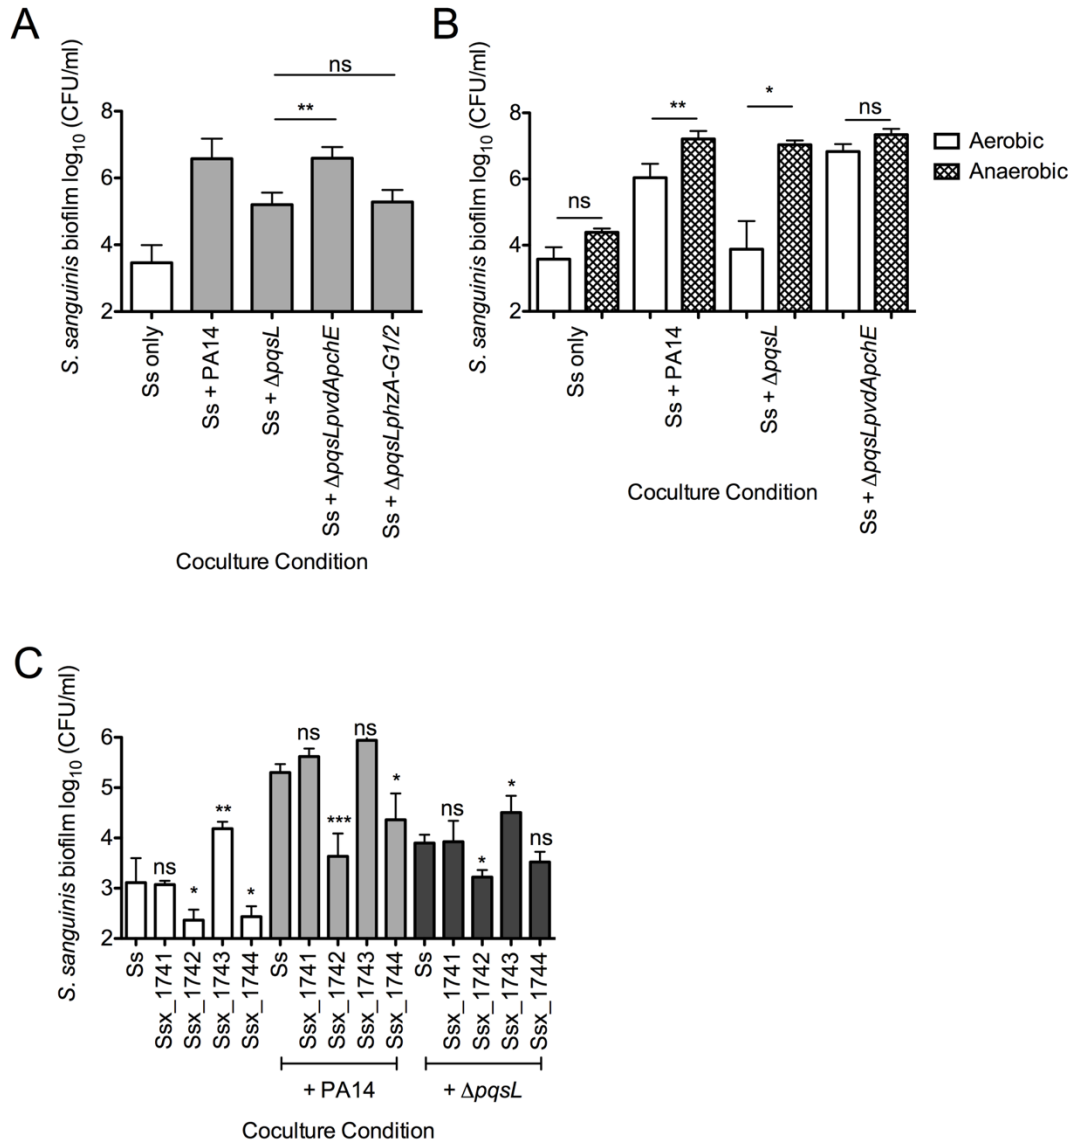

Figure 5

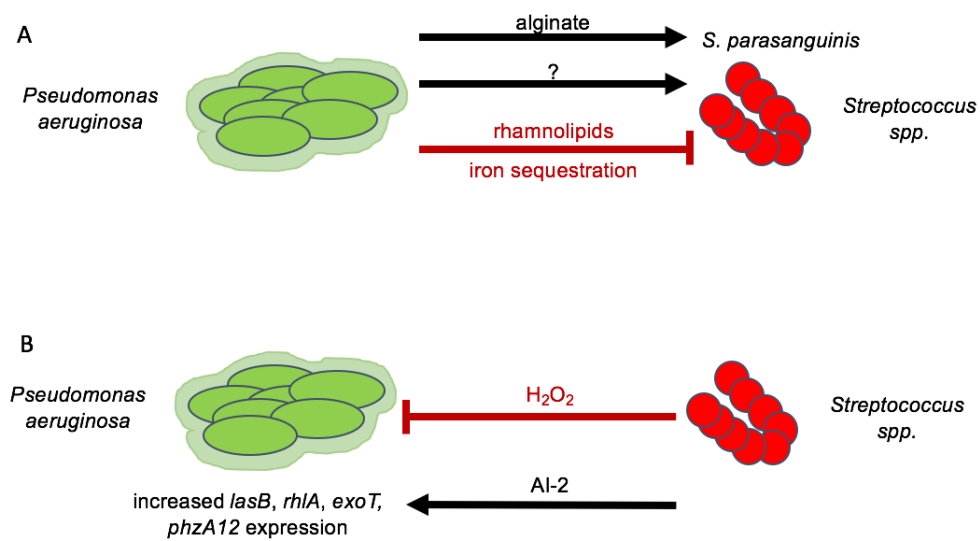

Source: http://biorxiv.org/content/10.1101/307488v1.full.pdf
