28 **Abstract**

29 Cystic Fibrosis (CF) is a genetic disease that causes patients to accumulate thick,  
30 dehydrated mucus in the lung and develop chronic, polymicrobial infections due to  
31 reduced mucociliary clearance. These chronic polymicrobial infections and subsequent  
32 decline in lung function are significant factors in the morbidity and mortality of CF.  
33 *Pseudomonas aeruginosa* and *Streptococcus* spp. are among the most prevalent  
34 organisms in the CF lung; the presence of *P. aeruginosa* correlates with lung function  
35 decline and the *Streptococcus milleri* group (SMG), a subgroup of the viridans  
36 streptococci, is associated with exacerbations in patients with CF. Here we characterize  
37 the interspecies interactions that occur between these two genera. We demonstrated  
38 that multiple *P. aeruginosa* laboratory strains and clinical CF isolates promote the  
39 growth of multiple SMG strains and oral streptococci in an *in vitro* coculture system. We  
40 investigated the mechanism by which *P. aeruginosa* enhances growth of streptococci by  
41 screening for mutants of *P. aeruginosa* PA14 unable to enhance *Streptococcus* growth,  
42 and we identified the *P. aeruginosa pqsL::TnM* mutant, which failed to promote growth  
43 of *S. constellatus* and *S. sanguinis*. Characterization of the *P. aeruginosa ΔpqsL* mutant  
44 revealed that this strain cannot promote *Streptococcus* growth. Our genetic data and  
45 growth studies support a model whereby the *P. aeruginosa ΔpqsL* mutant overproduces  
46 siderophores, and thus likely outcompetes *Streptococcus sanguinis* for limited iron. We  
47 propose a model whereby competition for iron represents one important means of  
48 interaction between *P. aeruginosa* and *Streptococcus* spp.

49

50 **Importance**

51 Cystic fibrosis (CF) lung infections are increasingly recognized for their polymicrobial  
52 nature. These polymicrobial infections may alter the biology of the organisms involved in  
53 CF-related infections, leading to changes in growth, virulence and/or antibiotic  
54 tolerance, and could thereby affect patient health and response to treatment. In this  
55 study, we demonstrate interactions between *P. aeruginosa* and streptococci using a  
56 coculture model, and show that one interaction between these microbes is likely  
57 competition for iron. Thus, these data indicate that one CF pathogen may influence the  
58 growth of another and add to our limited knowledge of polymicrobial interactions in the  
59 CF airway.

## 60 **Introduction**

61 Cystic fibrosis (CF) is a genetic disease caused by a defect in the cystic fibrosis  
62 transmembrane conductance regulator (1), which leads to reduced mucociliary  
63 clearance in the lungs of these patients (2). Due to this reduced mucociliary clearance,  
64 bacteria colonize the lungs of patients with CF and establish chronic, polymicrobial  
65 infections that cause increased inflammation and respiratory function decline (2).  
66 Recent studies have demonstrated that the microbiota in the lungs form polymicrobial  
67 biofilms, and that mixed bacterial biofilm populations can affect antibiotic tolerance and  
68 bacterial virulence (3, 4).

69 The *Streptococcus milleri* group (SMG), which is composed of three species (*S.*  
70 *anginosus*, *S. constellatus*, and *S. intermedius*), has been isolated from sputum  
71 samples of patients with CF. When these microbes are the numerically dominant  
72 species in the lung, these organisms correlate with exacerbation in patients with CF (5-  
73 8). In contrast, previous research from our laboratory (9) and two other groups (10, 11)  
74 demonstrated that increased relative abundance of *Streptococcus* spp. within the CF  
75 lung microbiome correlates with better lung function and clinical stability. Together these  
76 data indicate a possible complex relationship between *Streptococcus* spp. and the host,  
77 and *Streptococcus* spp. and the other microbes in the CF airway.

78 *Pseudomonas aeruginosa* is the dominant microorganism (>50% relative  
79 abundance) in the lungs of ~45% of adults patients with CF (12), is cultured from >80%  
80 of these patients (13), and is the predominant microbe in the lung at end stage disease  
81 (14). *P. aeruginosa* and streptococci have been found to co-colonize CF patients (5, 6,  
82 8, 15, 16), but the polymicrobial interactions that occur between these organisms are

83 not well studied. Previous studies investigating interactions between *P. aeruginosa* and  
84 *Streptococcus* spp. demonstrated that *Streptococcus* spp. can influence production of  
85 *P. aeruginosa* virulence factors such as rhamnolipids, elastase, and phenazines (7, 17-  
86 20), and can suppress *P. aeruginosa* growth through hydrogen peroxide production (17)  
87 and production of reactive nitrogenous intermediates (21, 22). Conversely, *P.*  
88 *aeruginosa* was found to influence the growth (17-20, 23, 24) and biofilm formation (24,  
89 25) of *Streptococcus* spp. Work from our lab demonstrated that *P. aeruginosa* PA14  
90 produces the surfactants  $\beta$ -hydroxyalkanoyl- $\beta$ -hydroxyalkanoic acids (HAAs) and  
91 monorhamnolipids which caused a 6-fold reduction in *S. constellatus* 7155 biofilm  
92 formation in coculture (24). The surfactant-induced biofilm suppression was relieved  
93 when *P. aeruginosa* and *S. constellatus* 7155 were cocultured in the presence of  
94 tobramycin, an antibiotic used for maintenance therapy by patients with CF. We  
95 determined that tobramycin suppressed *P. aeruginosa* production of HAAs and  
96 monorhamnolipids, and that in the presence of tobramycin, *P. aeruginosa* can enhance  
97 *S. constellatus* 7155 growth on a CF-derived bronchial epithelial cell (CFBE) monolayer  
98 (24). These data indicate that *P. aeruginosa* can both positively and negatively impact  
99 cocultured microbes, including *Streptococcus* spp., and the interaction between the  
100 microbes can be influenced by environmental and/or clinical context.

101 In this study, we investigate the ability of *P. aeruginosa* to influence  
102 *Streptococcus* growth in our *in vitro* coculture system. We demonstrate that multiple *P.*  
103 *aeruginosa* strains and clinical isolates can enhance the growth of multiple  
104 *Streptococcus* spp. We used a candidate gene approach and a genetic screen to  
105 identify *P. aeruginosa* mutants that were unable to support *Streptococcus* growth, and

106 found a single mutant of *P. aeruginosa* that no longer enhances growth of streptococci.  
107 We found that the *P. aeruginosa*  $\Delta pqsL$  mutant suppressed *S. sanguinis* growth, likely  
108 via a mechanism that involves siderophore overproduction and thus iron sequestration.  
109 These data indicate that competition for iron can impact this polymicrobial interaction.

110

## 111 **Results**

112

113 ***P. aeruginosa* promotes streptococcal growth in a coculture system.** We reported  
114 previously that *P. aeruginosa* can enhance viable *S. constellatus* 7155 cell number  
115 when grown as a coculture on CF-derived bronchial epithelial (CFBE) cells (24). We first  
116 sought to recapitulate the finding that *P. aeruginosa* promotes the *Streptococcus* biofilm  
117 population by using the model organism *S. sanguinis* SK36 in coculture conditions in  
118 the absence of CFBE cells. We used *P. aeruginosa* PAO1 and *S. sanguinis* SK36 for  
119 these experiments because both are sequenced strains (26-28) with available genetic  
120 mutant libraries (29-31). This simplified coculture system allowed us to test the  
121 interaction between *P. aeruginosa* and streptococci without confounding factors  
122 contributed by the CFBE cells.

123 To test the hypothesis that *S. sanguinis* SK36 viable cell number increases in  
124 coculture with *P. aeruginosa* PAO1 in absence of CFBE cells, we grew *P. aeruginosa*  
125 PAO1 and *S. sanguinis* SK36 in coculture in the wells of a plastic culture dish in the  
126 minimal medium MEM tissue culture medium containing glucose. We observed that the  
127 number of viable *S. sanguinis* SK36 in a biofilm was enhanced 100-1055-fold by  
128 coculture with *P. aeruginosa* PAO1 compared to *S. sanguinis* SK36 grown as a

129 monoculture in MEM (Fig. 1A, see also Fig. S1A). *P. aeruginosa* PAO1 biofilm growth  
130 was not significantly affected by coculture with *S. sanguinis* SK36 (Fig. S1B). These  
131 data also indicate that the enhancement of the *S. sanguinis* SK36 population in a biofilm  
132 by *P. aeruginosa* PAO1 does not require the CFBE cells.

133

134 ***P. aeruginosa* enhances growth of *S. sanguinis* SK36.** We considered two models of  
135 polymicrobial interaction that may be enhancing viable *S. sanguinis* SK36 cells in the  
136 biofilm when grown in coculture with *P. aeruginosa*. *P. aeruginosa* might promote  
137 *Streptococcus* adhesion and biofilm formation, or *P. aeruginosa* may promote  
138 streptococcal growth. To distinguish between these models, we conducted a time  
139 course experiment with *P. aeruginosa* PA14, *P. aeruginosa* PAO1, and *S. sanguinis*  
140 SK36. If *P. aeruginosa* was promoting adhesion of *S. sanguinis* SK36 cells rather than  
141 growth, we predict that we would detect more *S. sanguinis* SK36 in the biofilm and  
142 fewer planktonic cells, but total cell number would not increase compared to *S.*  
143 *sanguinis* SK36 monoculture. In contrast, if *P. aeruginosa* were enhancing *S. sanguinis*  
144 SK36 growth, then both total biofilm and planktonic *S. sanguinis* SK36 populations  
145 should increase in coculture compared to *S. sanguinis* SK36 monoculture. As  
146 demonstrated by the increased *S. sanguinis* SK36 biofilm and planktonic cells  
147 recovered from coculture compared to monoculture, *P. aeruginosa* appears to promote  
148 the growth of *S. sanguinis* SK36 (Fig. 1B, and Fig. S2A and S2B), thus accounting for  
149 the increased population of *S. sanguinis* SK36 biofilm cells.

150

151 **Multiple *P. aeruginosa* strains enhance the growth of multiple streptococci.** Based  
152 on current evidence that multiple *Streptococcus* species inhabit the CF lung (8, 32) and  
153 influence patient health (5, 6, 8-11, 15, 16), we sought to determine whether the  
154 observed enhancement of *Streptococcus* viable counts in coculture with *P. aeruginosa*  
155 may be more broadly generalized to other streptococci, including the *Streptococcus*  
156 *milleri* group (SMG), which has been implicated in CF-related exacerbations (5, 6, 8,  
157 15). To assess the ability of *P. aeruginosa* to promote multiple *Streptococcus* spp., we  
158 cocultured *P. aeruginosa* PAO1 with 6 SMG isolates and 8 oral *Streptococcus* spp.  
159 Figure 1C depicts a representative strain of each streptococcal species assayed, and  
160 shows the biofilm population obtained from monoculture and coculture with *P.*  
161 *aeruginosa* PAO1, respectively (see also Fig. S3A for all 14 strains tested). *P.*  
162 *aeruginosa* PAO1 growth was not significantly affected by coculture with any of the  
163 *Streptococcus* spp. tested (Fig. S3B).

164 We found that *P. aeruginosa* PAO1 significantly enhanced the growth of one of  
165 the two *S. anginosus*, two of two *S. intermedius*, and neither of the two *S. constellatus*  
166 strains tested. Additionally, of the oral *Streptococcus* spp. tested, *P. aeruginosa* PAO1  
167 significantly promoted the growth of one of the two *S. oralis*, the one *S. parasanguinis*,  
168 and one of the three *S. salivarius* isolates, but not the *S. pneumoniae* or *S. peroris*  
169 isolates tested (Fig. 1C and Fig. S3A). While not every *Streptococcus* isolate tested  
170 demonstrated significant increase in viable population recovered from the coculture,  
171 most species tested exhibited a trend toward increased growth when cocultured with *P.*  
172 *aeruginosa* PAO1. These data suggest that *P. aeruginosa* may be promoting  
173 *Streptococcus* growth through a pathway that affects many *Streptococcus* species.



174           Next we assessed whether multiple *P. aeruginosa* clinical and laboratory strains  
175 could promote the growth of *S. sanguinis*. Additionally, given that *S. parasanguinis* was  
176 found to bind extracellular alginate produced by mucoid *P. aeruginosa* strains (25), we  
177 tested whether mucoid or nonmucoid *P. aeruginosa* could better promote growth in our  
178 coculture system. We cocultured *S. sanguinis* SK36 with seven nonmucoid *P.*  
179 *aeruginosa* and four mucoid *P. aeruginosa* laboratory and clinical strains, and observed  
180 a significant growth enhancement of *S. sanguinis* SK36 by ten out of eleven *P.*  
181 *aeruginosa* strains tested in coculture biofilms (Fig. 1D) and planktonic growth (Fig.  
182 S4A). The growth of all tested *P. aeruginosa* strains was not affected by coculture with  
183 *S. sanguinis* SK36 (Fig. S4B, S4C).

184           Additionally, *P. aeruginosa* PAO1 (parental) and *P. aeruginosa* PDO300 *mucA22*  
185 are isogenic nonmucoid and mucoid strains, respectively. We found a significant  
186 enhancement in viable *S. sanguinis* SK36 biofilm cells recovered from coculture with *P.*  
187 *aeruginosa* PDO300 *mucA22* compared to *P. aeruginosa* PAO1 (Fig. 1D), suggesting  
188 that mucoid *P. aeruginosa* strains may better enhance *Streptococcus* growth.  
189 Additionally, these mucoid *P. aeruginosa* strains showed among the most robust  
190 promotion of viable counts when cocultured with *Streptococcus*.

191           To extend our findings here, we next tested the growth enhancing capability of *P.*  
192 *aeruginosa* PA14 in rich medium, using both lysogeny broth (LB) and Todd Hewitt broth  
193 supplemented with 0.5% yeast extract (THY) and found that *P. aeruginosa* PA14 is able  
194 to significantly enhance *S. sanguinis* SK36 growth in these conditions (Fig. S4D). These  
195 data suggest that *P. aeruginosa* may be providing nutrients to *S. sanguinis* SK36 in  
196 minimal medium, given that *S. sanguinis* SK36 growth in rich medium monoculture

197 reaches a level comparable to that of coculture in minimal medium. However, there is  
198 still a significant increase in *S. sanguinis* SK36 growth when in coculture with *P.*  
199 *aeruginosa* PA14 in rich medium, perhaps indicating non-nutritional mechanisms of  
200 growth enhancement by *P. aeruginosa*.

201 In summary, we have demonstrated that our minimal medium coculture assay  
202 using a plastic substratum can recapitulate our prior observation that *P. aeruginosa*  
203 promotes streptococcal growth on airway cells. This observation extends to coculture  
204 assays in rich medium. Furthermore, we were able to determine that *P. aeruginosa* is  
205 likely promoting *Streptococcus* growth rather than increasing the biofilm population via  
206 enhanced adherence. The *Streptococcus* growth-enhancement phenotype occurred  
207 among most oral streptococci tested, and the majority of *P. aeruginosa* clinical and  
208 laboratory strains are capable of promoting *Streptococcus* growth, which lends support  
209 to the idea that these interactions are common among these two genera.

210

211 **Known *P. aeruginosa* virulence pathways are not involved in the *Streptococcus***  
212 **growth-promoting phenotype.** *P. aeruginosa* has many well characterized virulence  
213 factors that have been demonstrated to impact polymicrobial interactions, including  
214 pathways for quorum sensing (33), biofilm formation, and the production of secreted  
215 molecules such as phenazines (34, 35), siderophores (3, 36), alginate (37), and  
216 rhamnolipids (24). We hypothesized that one or more of these virulence factors might  
217 be altering *Streptococcus* growth in our system. To test this idea, we utilized a  
218 candidate genetic approach to assess whether any of these virulence pathways may be  
219 involved in the observed growth-enhancing phenotype. We cocultured *P. aeruginosa*

220 PA14 mutants in each of the above pathways with *S. constellatus* 7155 as a model  
221 streptococcal strain known to positively respond to *P. aeruginosa* growth enhancement  
222 (24, 38), and assessed whether any of these mutants lost the ability to enhance *S.*  
223 *constellatus* 7155 growth. We found that none of the pathways tested were involved in  
224 enhancement of *S. constellatus* 7155 growth (Table S1).

225         Given that KatA has been found in the supernatant of *P. aeruginosa* cultures (38-  
226 40) we also constructed *P. aeruginosa* PA14  $\Delta katA$ ,  $\Delta katB$ , and  $\Delta katA\Delta katB$  mutant  
227 strains in order to test the hypothesis that extracellular *P. aeruginosa* catalase is  
228 enhancing *S. sanguinis* SK36 growth by degrading hydrogen peroxide produced by *S.*  
229 *sanguinis* SK36. It has previously been reported that *S. sanguinis* and other oral  
230 streptococci can inhibit *P. aeruginosa* growth through hydrogen peroxide production  
231 (17, 21, 22), and that the hydrogen peroxide produced by oral streptococci plays an  
232 important role in growth inhibition, eDNA release, and biofilm formation within the oral  
233 microbiome (41, 42). We chose to mutate the *katA* and *katB* genes and not the *katE*  
234 gene because previous reports indicate that KatA is the major catalase utilized by *P.*  
235 *aeruginosa*, and that KatB can partially recover hydrogen peroxide resistance in the  
236 absence of KatA (38, 43). KatE was not demonstrated to play a role in alleviating  
237 hydrogen peroxide stress (43). *S. sanguinis* SK36 did not demonstrate reduced growth  
238 in coculture with the *P. aeruginosa* PA14  $\Delta katA$ ,  $\Delta katB$ , or  $\Delta katA\Delta katB$  mutant strains  
239 compared to wild-type *P. aeruginosa* PA14, indicating that catalase is not playing a role  
240 in the *Streptococcus* growth enhancement phenotype (Table S1 and Fig. S5A). The *P.*  
241 *aeruginosa*  $\Delta katA$  mutant displays a slight, but significant growth defect in the coculture  
242 compared to wild-type *P. aeruginosa* PA14 in coculture, and the  $\Delta katB$  mutant displays

243 a modest, but significant growth defect in monoculture compared to *P. aeruginosa* PA14  
244 in coculture (Fig. S5B), but these strains still stimulate *S. sanguinis* SK36 growth to the  
245 level observed for wild-type *P. aeruginosa*. Taken together, these data suggest known  
246 virulence factors, on their own, do not contribute to *P. aeruginosa*-mediated growth  
247 enhancement of *Streptococcus* spp.

248

249 **Screening the *P. aeruginosa* PA14NR Set for *P. aeruginosa* PA14 transposon**  
250 **insertion mutant strains that do not support *S. constellatus* growth.** The Ausubel  
251 lab reported a nonredundant library of *P. aeruginosa* PA14 transposon insertion  
252 mutants (PA14NR Set) containing 5,459 transposon insertion mutant strains with  
253 mutations in 4,596 genes (44). Each of these *P. aeruginosa* PA14 transposon mutant  
254 strains were tested in coculture with *S. constellatus* 7155 (Fig. 2A). Of the 5,459 mutant  
255 strains in the library, 48 strains were unable to promote *S. constellatus* 7155 growth in  
256 two replicate experiments (Table S2). Two of these 48 mutants were eliminated when  
257 we tested available deletion mutants as the deletion mutant strains did not recapitulate  
258 the phenotype of the transposon mutation (not shown). The remaining 46 transposon  
259 mutants (Table S2) were tested in our standard coculture assay with *S. sanguinis* SK36  
260 to determine which *P. aeruginosa* PA14 transposon mutants are unable to enhance  
261 *Streptococcus* growth in a second strain. 44 of the 46 *P. aeruginosa* PA14 transposon  
262 mutants were capable of enhancing growth of *S. sanguinis* SK36, and thus were  
263 unlikely involved in a general pathway for enhancing growth of *Streptococcus*. We found  
264 that two transposon mutants were unable to promote either *S. constellatus* 7155 or *S.*  
265 *sanguinis* SK36 growth: *P. aeruginosa* *pqsL::TnM* and *P. aeruginosa* *dbpA::TnM*.

266 The *dbpA* gene codes for the RNA helicase DbpA, which has been demonstrated  
267 to play a role in the formation of the 50S ribosomal subunit in *Escherichia coli* (45). *E.*  
268 *coli* is able to compensate for  $\Delta dbpA$  deletions in forming the 50S ribosomal subunit, as  
269 described previously (46); an inability to form the 50S ribosomal subunit would  
270 otherwise cause a lethal protein synthesis defect, and a dominant negative *dbpA*  
271 mutation is necessary to observe a defect in DbpA function in *E. coli*. We built and  
272 assayed the *P. aeruginosa* PA14  $\Delta dbpA$  mutant strain and found no significant defect in  
273 *S. sanguinis* SK36 growth enhancement (Fig. S6A) or in *P. aeruginosa* growth (Fig.  
274 S6B), and thus did not pursue further study of this mutant.

275 We previously studied the effects of the *Pseudomonas* quinolone signal pathway  
276 (*pqs*) on interactions between *P. aeruginosa* and *Staphylococcus aureus*, including the  
277 utilization of 2-heptyl-4-hydroxyquinoline-*N*-oxide (HQNO), a respiratory chain inhibitor,  
278 to drive *S. aureus* to fermentative metabolism (3, 37, 47). As was observed for *S.*  
279 *constellatus* 7155, there was a significant reduction in the ability of *P. aeruginosa*  
280 *pqsL::TnM* mutant to support *S. sanguinis* SK36 growth compared to the wild-type *P.*  
281 *aeruginosa* PA14 (Fig. 2B). There was no detectable growth defect of the *pqsL::TnM*  
282 mutant strain compared to wild-type *P. aeruginosa* PA14 in our assay condition (Fig.  
283 S7). We chose to focus on the *P. aeruginosa pqsL::TnM* mutant for the remainder of our  
284 study.

285

286 **The *P. aeruginosa*  $\Delta pqsL$  mutant has a defect in *Streptococcus* growth**  
287 **enhancement.** The PQS pathway involves the production of multiple 4-hydroxy-2-  
288 alkylquinolones (HAQs) and begins with anthranilic acid, which is converted to

289 intermediates of unknown structure by the enzymes PqsA and PqsD (Fig. 3A). These  
290 unknown intermediates can then be converted into HQNO by PqsL, our gene of interest,  
291 or 4-hydroxy-2-heptylquinoline (HHQ) by PqsB and PqsC. HHQ can then be converted  
292 into 3,4-dihydroxy-2-heptylquinoline (PQS) by PqsH (48-50). MvfR (also known as  
293 PqsR) is the transcriptional regulator that is activated by HHQ and PQS and positively  
294 regulates the transcription of operons involved in PQS production, and the LasR, and  
295 RhIR quorum sensing pathways, as well as the operons required for production of the  
296 siderophores pyoverdine and pyochelin (51, 52). MvfR/PqsR and PQS have also been  
297 demonstrated to indirectly increase expression of the phenazine pyocyanin (51).

298 We considered two different mechanisms that could explain why the growth of *S.*  
299 *sanguinis* SK36 is no longer promoted by coculture with the *P. aeruginosa* PA14  
300 *pqsL::TnM*. We hypothesized that either the *pqsL::TnM* strain may no longer be able to  
301 promote *S. sanguinis* SK36 growth, or the loss of PqsL function resulted in a *P.*  
302 *aeruginosa* strain that reduced *S. sanguinis* SK36 viability. To distinguish between  
303 these hypotheses, we assessed the *Streptococcus* growth enhancement capabilities of  
304 *P. aeruginosa* PA14 deletion mutants in the *pqs* pathway when grown in coculture with  
305 *S. sanguinis* SK36. We found that the  $\Delta pqsL$  mutant was the only mutant in the *pqs*  
306 pathway that was unable to promote *S. sanguinis* SK36 growth (Fig. 3B, and Fig. S8A  
307 for *S. sanguinis* SK36 planktonic growth, Fig. S8B-C for *P. aeruginosa* biofilm and  
308 planktonic growth).

309 We complemented the  $\Delta pqsL$  strain with an arabinose inducible pMQ72-*pqsL*  
310 construct and demonstrated a significant increase in viable *S. sanguinis* SK36 biofilm  
311 cells recovered when the complemented strain was induced with 0.2% arabinose (Fig.

312 3C, and Fig. S9A for planktonic growth); there was no significant difference between  
313 wild-type *P. aeruginosa* PA14 and the complemented  $\Delta pqsL/pMQ72-pqsL$  strain.  
314 Additionally, there was no significant difference in *P. aeruginosa* biofilm and planktonic  
315 growth in medium amended with 0.2% arabinose, the inducer of the expression for the  
316 P<sub>BAD</sub> promoter on the pMQ72 plasmid (Fig. S9B-C).

317         Additionally, we assayed the *P. aeruginosa*  $\Delta pqsL$  mutant strain in coculture with  
318 a few representative *Streptococcus* spp. from Fig. 1B to determine if the  $\Delta pqsL$  mutant  
319 strain has a broad defect in *Streptococcus* growth enhancement (Fig. 3D). We found  
320 that for *S. intermedius* 4807, there was a slight but non-significant growth decrease  
321 during coculture with *P. aeruginosa*  $\Delta pqsL$ , indicating that the mutant strain is unable to  
322 enhance *Streptococcus* growth. Similarly, we saw a non-significant decrease in *S.*  
323 *parasanguinis* 5357 growth in coculture with the  $\Delta pqsL$  mutant compared to wild-type *P.*  
324 *aeruginosa* PA14. We did observe a significant decrease in *S. anginosus* 5535 cells  
325 recovered from the coculture with the  $\Delta pqsL$  mutant strain compared to monoculture  
326 and coculture conditions with *P. aeruginosa* PA14, indicating that the  $\Delta pqsL$  mutation is  
327 contributing to the repression of the growth of *S. anginosus* 5535. We found that both  
328 wild-type *P. aeruginosa* PA14 and the  $\Delta pqsL$  mutant strain caused a non-significant  
329 reduction in *S. intermedius* 7155 cells recovered from coculture, indicating that both of  
330 these *P. aeruginosa* strains may be able to outcompete *S. intermedius* 7155. We saw  
331 no significant changes to *P. aeruginosa* growth while in coculture with these  
332 representative *Streptococcus* spp. (Fig. S10). Taken together, we can extend our  
333 finding to at least one other strain of *Streptococcus*.

334



335 **The *P. aeruginosa*  $\Delta pqsL$  mutant likely suppresses *S. sanguinis* SK36 growth by**  
336 **siderophore production via iron sequestration.** It has been demonstrated previously  
337 that a *pqsL* mutant is deficient in HQNO production and overproduces PQS (49).  
338 Exogenous PQS has been demonstrated to chelate iron and to increase the expression  
339 of the genes coding for siderophore and phenazine biosynthesis enzymes in *P.*  
340 *aeruginosa* (53-55). Thus, we hypothesized that it was the increased production of PQS  
341 and/or increased expression of one or more PQS-regulated genes that caused the  
342 observed loss in growth promotion of *S. sanguinis* SK36.

343 To test our hypothesis, we assayed *S. sanguinis* SK36 in coculture with the  
344  $\Delta pqsL$  mutant strains deficient in production of the virulence factors regulated by PQS:  
345 siderophores ( $\Delta pqsL\Delta pvdA\Delta pchE$ ) and phenazines ( $\Delta pqsL\Delta phzA-G1/2$ ) (51, 53-55). We  
346 found that the *P. aeruginosa*  $\Delta pqsL\Delta pvdA\Delta pchE$  deletion mutant strain restored *S.*  
347 *sanguinis* SK36 growth enhancement to levels similar to wild-type *P. aeruginosa* PA14  
348 (Fig. 4A) without affecting *P. aeruginosa* growth (Fig. S11). In contrast, the *P.*  
349 *aeruginosa*  $\Delta pqsL\Delta phzA-G1/2$  mutant did not restore *S. sanguinis* SK36 growth (Fig.  
350 4A, Fig. S11).

351 We performed a complementation experiment to further confirm a role for  
352 siderophores in the ability of the  $\Delta pqsL$  mutant to reduce the viability of *Streptococcus*.  
353 Specifically, we asked whether complementing the mutation in one of the genes  
354 required for siderophore production (*pchE*) would restore the growth defect of the  
355  $\Delta pqsL\Delta pvdA\Delta pchE$  mutant to a phenotype similar to that observed for the  $\Delta pqsL$   
356 mutant. We cloned *pchE* into the vector pMQ72, and compared to the vector control  
357 strain ( $\Delta pqsL\Delta pvdA\Delta pchE/pMQ72$ ), the complemented strain  $\Delta pqsL\Delta pvdA\Delta pchE/$



358 pMQ72-*pchE* showed a phenotype not significantly different from the  $\Delta pqsL$  mutant  
359 (Fig. S12). These data confirmed that it was indeed loss of siderophore production in  
360 the  $\Delta pqsL$  mutant background that allowed the  $\Delta pqsL\Delta pvdA\Delta pchE$  strain to enhance  
361 growth of *S. sanguinis* SK36.

362 A prediction of this iron sequestration model is that iron supplementation should  
363 restore the *Streptococcus* enhancing activity of the *P. aeruginosa*  $\Delta pqsL$  mutant. We  
364 added 50 $\mu$ M FeCl<sub>3</sub> to our minimal medium coculture conditions and saw restoration of  
365 *S. sanguinis* SK36 growth enhancement 6 out of 18 times we performed the  
366 experiment. We explored this phenotype using a range of FeCl<sub>3</sub> concentrations from  
367 5 $\mu$ M to 50 $\mu$ M, making a fresh FeCl<sub>3</sub> solution daily, using buffered media in our assay  
368 and when making the FeCl<sub>3</sub> stock solution, but the phenotype was still variable. We do  
369 not fully understand why the iron rescue phenotype was so variable. We measured the  
370 iron levels of the medium used in our coculture conditions (MEM) using ICP/MS and  
371 showed that the concentration of iron is below the limit of detection (<5 ppb), so it is  
372 plausible that the streptococci are iron limited in our coculture conditions.

373 Next, we tested the idea that coculture in anaerobic conditions would also lead to  
374 recovery of the *Streptococcus* growth promotion phenotype in the  $\Delta pqsL$  mutant,  
375 because *P. aeruginosa* has been demonstrated to reduce pyoverdine and pyochelin  
376 production in anoxic conditions (56). Upon anaerobic coculture in an AnaeroPak-Anaero  
377 container with a GasPak satchet, the *P. aeruginosa*  $\Delta pqsL$  mutant significantly  
378 enhanced *S. sanguinis* SK36 viability compared to coculture under aerobic conditions  
379 (Fig. 4B and Fig. S13A). The level of *S. sanguinis* growth enhancement promoted by  
380 the *P. aeruginosa*  $\Delta pqsL$  mutant in anaerobic conditions was equivalent to that

381 observed for the wild-type *P. aeruginosa*. Additionally, if *P. aeruginosa* were enhancing  
382 *S. sanguinis* SK36 growth solely through oxygen consumption, we would expect to see  
383 enhanced *S. sanguinis* SK36 growth in monoculture under anaerobic conditions, which  
384 we do not observe here.

385 We note that *P. aeruginosa* biofilm and planktonic growth were decreased under  
386 the anaerobic growth conditions used in these experiments compared to what we  
387 typically observe under aerobic conditions (Fig. S13B-C), which is not surprising given  
388 that aerobic respiration is the main means of energy generation for this microbe.  
389 Together, these data indicate that wild-type *P. aeruginosa* is contributing to the growth  
390 of *S. sanguinis* SK36 via a mechanism independent of oxygen consumption in our  
391 coculture system, and are consistent with our hypothesis that reduced siderophore  
392 production under anaerobic conditions mitigates the phenotype of the  $\Delta pqsL$  mutant.

393

394 **An iron ABC transporter of *S. sanguinis* SK36 participates in competition with *P.***  
395 ***aeruginosa*.** Our data suggest that one component of the interaction between *P.*  
396 *aeruginosa* and *Streptococcus* spp. is the competition for iron. The genome of *S.*  
397 *sanguinis* SK36 has been sequenced and annotated, and using this information we  
398 identified several gene products that, based on their annotation, might be involved in  
399 iron uptake. We predicted that if *S. sanguinis* SK36 is indeed competing with *P.*  
400 *aeruginosa* for iron, loss of one or more of these iron uptake system would compromise  
401 the ability of *S. sanguinis* SK36 to grow in coculture with *P. aeruginosa*. Given that the  
402  $\Delta pqsL$  mutant likely has an enhanced capacity to scavenge iron as indicated by the  
403 restoration of *S. sanguinis* SK36 growth enhancement by the  $\Delta pqsL\Delta pvdA\Delta pchE$

404 mutant, any compromise observed for *S. sanguinis* SK36 iron acquisition mutants  
405 should be exacerbated in coculture with the *P. aeruginosa*  $\Delta pqsL$  mutant.

406 Xu and colleagues reported a mutant library of *S. sanguinis* SK36 wherein non-  
407 essential genes are deleted and replaced with a kanamycin resistance cassette (29,  
408 30). Using this library, we examined whether selected *S. sanguinis* SK36 mutant strains  
409 lacking genes involved in iron uptake (Table 1) have reduced growth in the presence of  
410 wild-type *P. aeruginosa* PA14 or the *P. aeruginosa*  $\Delta pqsL$  strain. We tested *S. sanguinis*  
411 SK36 strains carrying mutations in genes coding for iron regulatory proteins, an iron-  
412 binding lipoprotein, a ferrichrome-binding protein, and predicted iron-uptake ABC  
413 transporters using the coculture assay. We found that all of the mutant strains tested  
414 behaved like wild-type *S. sanguinis* SK36 in coculture, except for the *S. sanguinis* SK36  
415 Ssx\_1742 and Ssx\_1744 mutant strains (Fig. 4C and S14A). The SSA\_1742 gene  
416 codes for a predicted ferrichrome-binding protein and the SSA\_1744 gene codes for a  
417 predicted permease protein of an iron compound ABC transporter.

418 The *S. sanguinis* SK36 Ssx\_1742 and Ssx\_1744 mutant strains demonstrated  
419 reduced growth in monoculture conditions, 6.5-fold and 6.9-fold respectively, indicating  
420 that they may be iron starved in our minimal medium growth conditions (Fig. 4C). This  
421 iron starvation phenotype is exacerbated in coculture with wild-type *P. aeruginosa* PA14  
422 with a 44.9-fold reduction in Ssx\_1742 cells and a 5.5-fold reduction in Ssx\_1744 cells  
423 obtained from coculture compared to wild-type *S. sanguinis* SK36 coculture.

424 To confirm that the observed competition defect was indeed due to the Ssx\_1742  
425 and Ssx\_1744 mutations, we complemented each of the mutants as described in the

426 Materials and Methods. As shown in Figure 4D, the complemented mutants showed  
427 competition phenotypes similar to that observed for wild-type *S. sanguinis* SK36.

428 We next explored the phenotype of the Ssx\_1742 and Ssx\_1744 mutants in  
429 coculture with the *P. aeruginosa*  $\Delta pqsL$  mutant strain. In coculture with the *P.*  
430 *aeruginosa*  $\Delta pqsL$  mutant strain there is a significant, 4.9-fold reduction in the Ssx\_1742  
431 mutant compared to wild-type *S. sanguinis* SK36 in coculture with the  $\Delta pqsL$  mutant.  
432 Importantly, coculture of the *S. sanguinis* SK36 Ssx\_1744 mutant strain showed no  
433 additional, significant growth defect when grown in coculture with the *P. aeruginosa*  
434  $\Delta pqsL$  mutant compared to the wild-type *P. aeruginosa* strain. We take this result to  
435 mean that the increased iron sequestration by the  $\Delta pqsL$  mutant is competing for the  
436 iron typically transported by the *S. sanguinis* SK36 Ssx\_1744-encoded iron ABC  
437 transporter; thus loss of Ssx\_1744 confers no additional phenotype when cocultured  
438 with the *P. aeruginosa* PA14  $\Delta pqsL$  mutant. Finally, we observed no significant  
439 difference in *P. aeruginosa* PA14 and the  $\Delta pqsL$  mutant strain growing in coculture with  
440 *S. sanguinis* SK36 mutant strains (Fig. S14B and S14C).

441

## 442 Discussion

443 In this study, we sought to characterize a polymicrobial interaction that occurs  
444 between *P. aeruginosa* and *Streptococcus* spp. We previously demonstrated that *P.*  
445 *aeruginosa* can suppress *S. constellatus* 7155 biofilms through surfactant production,  
446 and that this suppression can be alleviated through treatment with the CF maintenance  
447 antibiotic, tobramycin (24). Our current work adds to our understanding of *P. aeruginosa*  
448 – *Streptococcus* interactions by demonstrating the widespread ability of multiple *P.*

449 *aeruginosa* clinical isolates from CF patients and laboratory strains to enhance the  
450 growth of multiple species of *Streptococcus*. To better understand the basis of the ability  
451 of *P. aeruginosa* to promote the growth of *Streptococcus* spp., we screened *P.*  
452 *aeruginosa* transposon insertion mutants to identify factors that contribute to the ability  
453 of *P. aeruginosa* to enhance growth of *S. constellatus* - we identified 46 candidate  
454 mutants. Following up on these mutants, we identified only one strain carrying a  
455 mutation in the *pqsL* gene that has a consistent, reduced *Streptococcus* spp. growth-  
456 enhancement phenotype versus multiple species of *Streptococcus*. Upon further  
457 investigation we revealed that this mutant no longer promotes *Streptococcus* growth  
458 because the *P. aeruginosa*  $\Delta pqsL$  mutant strain likely actively competes with  
459 *Streptococcus* for iron. Loss of PqsL function has been reported to enhance PQS  
460 production (49), excess PQS has been demonstrated to enhance siderophore  
461 biosynthesis gene transcription (53-55), and PQS-mediated iron sequestration by *P.*  
462 *aeruginosa* has been demonstrated to reduce growth of both Gram-positive and Gram-  
463 negative soil bacteria (33). This PQS-mediated growth inhibition of soil bacterial growth  
464 can be restored upon addition of 50 $\mu$ M FeCl<sub>3</sub> (33). Similarly, our data show the ability to  
465 restore *Streptococcus* growth by introducing mutations in the siderophore genes to the  
466  $\Delta pqsL$  mutant or by growing the cocultures anaerobically, a growth condition where *P.*  
467 *aeruginosa* is known to reduce pyoverdine and pyochelin production (56). Consistent  
468 with these data, we observed that *S. sanguinis* SK36 grew slightly more in the presence  
469 of *P. aeruginosa* PA14  $\Delta pqsLpvdApchE$  mutant than wild-type *P. aeruginosa* PA14. The  
470 increased *S. sanguinis* SK36 growth indicates that these microbes are competing for  
471 iron during coculture, and that changes to iron uptake can alter the competition between

472 these two microbes. In addition, PQS has been demonstrated to act as both an anti-  
473 and pro-oxidant under different conditions (57), and we cannot rule out that the  
474 increased PQS production in the  $\Delta pqsL$  mutant impacts production of reactive oxygen  
475 species that may be toxic to *Streptococcus* spp.; the fact that growth of the  $\Delta pqsL$   
476 mutant under anaerobic conditions reverses the growth phenotype is consistent with  
477 this idea.

478 An interesting observation from this study was the demonstration of a significant  
479 increase in *S. sanguinis* SK36 biofilm growth between an isogenic nonmucoid and  
480 mucoid *P. aeruginosa* PAO1 strain. Previous work demonstrated that *S. parasanguinis*  
481 is able to use the streptococcal surface adhesin BapA1 to bind alginate produced by  
482 mucoid *P. aeruginosa* and enhance *S. parasanguinis* biofilm formation *in vitro*, however  
483 *S. gordonii* and *S. sanguinis* SK36 did not demonstrate enhanced biofilm formation (25).  
484 Here we demonstrate a significant growth increase of *S. sanguinis* SK36 when in  
485 coculture with *P. aeruginosa* PDO300 *mucA22* compared to the isogenic nonmucoid  
486 strain. It is possible that *S. sanguinis* SK36 can also bind to alginate. Alternatively, we  
487 hypothesize that the growth enhancement induced by the mucoid *P. aeruginosa* strain  
488 may be due to decreased rhamnolipid production that has been described in mucoid  
489 strains (37), and rhamnolipids (24) and the corresponding relief of rhamnolipid-induced  
490 *Streptococcus* killing (24). Furthermore, mucoid strains were shown to produce lower  
491 levels of products of the PQS pathway and reduced levels of siderophores (37). Thus,  
492 *Streptococcus* spp. may more readily coexist, and perhaps grow to larger numbers, in  
493 patients with mucoid *P. aeruginosa*, a question that could be answered by performing a  
494 clinical study assessing relative levels of *Streptococcus* spp. as a function of mucoid *P.*

495 *aeruginosa*. Furthermore, these data indicate that the interactions between *P.*  
496 *aeruginosa* and *Streptococcus* may change over the lifetime of patients with CF as the  
497 colonizing *P. aeruginosa* converts to mucoidy.

498 Oral streptococci have been demonstrated to utilize hydrogen peroxide to inhibit  
499 the growth and colonization of competing microorganisms (17, 21, 22, 42), and we  
500 hypothesized that *P. aeruginosa* catalase might play a role in enhancing *Streptococcus*  
501 growth as catalase has been found in the supernatant of *P. aeruginosa* cultures (39, 40,  
502 43). However, we found no significant defect in *S. sanguinis* SK36 growth enhancement  
503 by the *P. aeruginosa*  $\Delta katA$ ,  $\Delta katB$ , and  $\Delta katA\Delta katB$  mutants compared to wild-type *P.*  
504 *aeruginosa* PA14, indicating that catalase is not the factor produced by *P. aeruginosa*  
505 that is enhancing *Streptococcus* growth. It has been demonstrated that *P. aeruginosa*  
506 does not secrete catalase and that it is found in the supernatant due *P. aeruginosa* cell  
507 lysis (39) – it may be that catalase found in the supernatant is too dilute to have a  
508 positive influence on *Streptococcus* growth in coculture, or that the hydrogen peroxide is  
509 not growth limiting to the streptococci in our coculture conditions. Thus, we conclude  
510 that *P. aeruginosa* catalase is not influencing *Streptococcus* growth in our model  
511 system. It is also worth noting that anaerobic coculture was not sufficient to enhance *S.*  
512 *sanguinis* SK36 monoculture growth to the same levels achieved during coculture with  
513 *P. aeruginosa* PA14 in aerobic conditions. These data indicate that *P. aeruginosa*-  
514 mediated growth enhancement of streptococci cannot be explained by oxygen  
515 consumption via *P. aeruginosa*.

516 To better understand how *S. sanguinis* SK36 might compete with *P. aeruginosa*  
517 for iron in iron-limiting conditions, we examined a set of *S. sanguinis* SK36 mutants



518 lacking putative iron uptake systems or regulatory genes. Of the nine mutants tested,  
519 only two showed reduced growth of *S. sanguinis* SK36 when in coculture with *P.*  
520 *aeruginosa* PA14: Ssx\_1742 lacking a ferrichrome-binding protein and Ssx\_1744  
521 lacking the permease protein of an iron-compound ABC transporter. The Ssx\_1742  
522 mutant demonstrated a significant growth defect in monoculture, and during coculture  
523 with *P. aeruginosa* PA14. The growth defect of the Ssx\_1742 mutant was worsened  
524 when cocultured with the  $\Delta pqsL$  mutant. Together, these data indicate that the  
525 Ssx\_1742 mutant strain is unable to compete with *P. aeruginosa* for the limited iron in  
526 our coculture conditions, and that the ferrichrome-binding protein encoded by Ssx\_1742  
527 is not involved in the competition for this metal with *P. aeruginosa*. In contrast, the  
528 Ssx\_1744 mutant showed no additional defect when cocultured with the  $\Delta pqsL$  mutant  
529 versus the wild-type *P. aeruginosa*. We take this result to mean that the increased  
530 production of the siderophores in the  $\Delta pqsL$  mutant is competing for the iron typically  
531 transported by the *S. sanguinis* SK36 Ssx\_1744-encoded iron ABC transporter; thus  
532 loss of Ssx\_1744 confers no additional phenotype when cocultured with the *P.*  
533 *aeruginosa* PA14  $\Delta pqsL$  mutant. These data indicate that the Ssx\_1744-encoded iron  
534 ABC transporter of *S. sanguinis* SK36 plays a key role in the competition with *P.*  
535 *aeruginosa*.

536 Our data support a second mechanism whereby *P. aeruginosa* can limit the  
537 growth of *Streptococcus* spp. (Figure 5), including SMG, via iron sequestration. We  
538 previously reported that *P. aeruginosa* rhamnolipid surfactants could reduce the viability  
539 of *S. constellatus*. *P. aeruginosa* can also influence the biofilm formation of *S.*  
540 *parasanguinis* through alginate production (25) and the growth of *Streptococcus* spp.



541 via a currently undescribed mechanisms (17, 18, 24). Conversely, previous studies  
542 investigating interactions between *P. aeruginosa* and *Streptococcus* spp. also showed  
543 that *Streptococcus* spp. influences transcription of *P. aeruginosa* virulence genes,  
544 including rhamnolipids, elastase, and phenazine biosynthesis genes through AI-2  
545 signaling (19) and an undescribed mechanism (7, 17, 18), and can suppress *P.*  
546 *aeruginosa* growth when they are a primary colonizer through production of H<sub>2</sub>O<sub>2</sub> (17,  
547 22) and reactive nitrogenous intermediates (21, 22). Thus, this polymicrobial interaction  
548 is complex.

549 Our data also indicate that *P. aeruginosa* can promote the growth of various  
550 *Streptococcus* spp., but we do not understand the basis of this growth promotion. We  
551 anticipated that the genetic screen described here would likely identify components of  
552 such a growth-promoting pathway in *P. aeruginosa*; instead, our screen only identified a  
553 single locus apparently involved in a competitive interaction. We suggest two possible  
554 explanations for our findings. First, perhaps *P. aeruginosa* determinants that promote  
555 *Streptococcus* growth are essential; we think this explanation unlikely, but a formal  
556 possibility. More likely is that *P. aeruginosa* has multiple, redundant pathways to boost  
557 *Streptococcus* growth. Thus, our genetic approach would be expected to fail to identify  
558 such redundant pathways, and alternative strategies to explore *P. aeruginosa*-  
559 *Streptococcus* interactions must be employed in future studies.

560 Finally, the observations we present here may be of relevance in the CF lung, as  
561 many patients are co-colonized by *P. aeruginosa* and *Streptococcus* spp. (9, 58).  
562 Analysis of the average available iron in the airway varies markedly between ~0.02 μM  
563 in healthy individuals and ~8 μM in patients with CF, and there is a great deal of

564 variability within patients with CF (59, 60). The increased iron in the CF airway is likely  
565 due to the reported enhanced levels of extracellular iron in the apical surface liquid of  
566 airway cells with a mutation in CFTR (61) and the bleeding into the airway (hemoptysis)  
567 associated with this patient population (62). Thus, in CF patients, iron levels in the  
568 airway can range from concentrations wherein we might expect direct competition  
569 between *P. aeruginosa* and *Streptococcus* for this limited resource, to levels wherein  
570 abundant iron would mitigate such competition. Additional studies are necessary to  
571 determine if *Streptococcus* spp. are iron limited (or not) in the CF airway, or in  
572 sufficiently close proximity to *P. aeruginosa* in the airway (i.e., in mixed microcolonies)  
573 to expect direct competition for iron in a local niche.

574

575 **Acknowledgements.** We thank Dr. Ping Xu for providing his *S. sanguinis* SK36 mutant  
576 library and the pVA838 vector, and Dr. Deborah Hogan, Dr. Nicholas Jacobs, and Dr.  
577 Dominique Limoli for providing bacterial strains. We thank Dr. Brian Jackson for  
578 quantifying the iron concentration in our media with ICP/MS. This work was supported  
579 by the Cystic Fibrosis Foundation (OTOOLE16GO), Molecular and Cellular Biology at  
580 Dartmouth training grant (T32GM008704), the Munck-Pfefferkorn Fund, and NIH (R37  
581 AI83256-06) to G.A.O and China Scholarship Council (CSC) Grant (201708330005) to  
582 K.L.

583

584 **Materials and Methods**

585

586 **Bacterial strains and growth conditions.** Strains used in this study are listed in  
587 Supplemental Table S3. *P. aeruginosa* strains were grown on lysogeny broth (LB) agar  
588 or in LB liquid with shaking at 37°C, and where indicated, in the presence of antibiotics  
589 at the following concentrations: 25µg/ml gentamicin, 250µg/ml kanamycin, 75µg/ml  
590 tetracycline. *Streptococcus* spp. were grown as previously described (24) on tryptic soy  
591 agar supplemented with 5% defibrinated sheep's blood (blood agar) or statically in Todd  
592 Hewitt broth supplemented with 0.5% yeast extract (THY) and 20µl/ml oxyrase  
593 (Oxyrase, Inc.) at 37°C with 5% CO<sub>2</sub>. *S. sanguinis* SK36 gene replacement mutant  
594 strains were grown on blood agar or THY with 500µg/ml kanamycin (30). For antibiotic  
595 selection during construction of the *S. sanguinis* SK36 complementation strains,  
596 spectinomycin (Spc) was used at a concentration of 100 µg/ml in *E. coli* and 200 µg/ml  
597 in *S. sanguinis* SK36.

598 At the end of each coculture assay, *P. aeruginosa* was grown overnight on  
599 *Pseudomonas* Isolation agar (PIA) at 37°C, and *Streptococcus* spp. were grown  
600 overnight on blood agar at 37°C anaerobically in AnaeroPak-Anaero containers  
601 (Thermo Fisher) or on blood agar supplemented with 10µg/ml neomycin and 10µg/ml  
602 polymixin B (*Streptococcus* selection agar) when specified. *Saccharomyces cerevisiae*  
603 strain InvSc1 (Invitrogen), was used for homologous recombination to build the pMQ30-  
604 *katA*, pMQ-30-*katB*, and pMQ30-*dbpA* deletion vector and pMQ72-*pqsL*  
605 complementation vector. InvSc1 was grown as previously described in 1% Bacto yeast  
606 extract, 2% Bacto peptone, and 2% dextrose (63). Synthetic defined agar-uracil (4813-  
607 065;Qbiogene) was used for InvSc1 selections.

608

609 **Species identification of streptococci.** *Streptococcus* spp. were isolated at the  
610 Dartmouth Hitchcock Medical Center in Lebanon, NH. *Streptococcus* clinical isolates  
611 were speciated using 16S rRNA gene sequencing. Genomic DNA (gDNA) was  
612 extracted from each strain from overnight cultures using the Gentra Puregene  
613 Yeast/Bact. Kit (QIAGEN) followed with 16S-ITS PCR as previously described (64)  
614 using the Strep16S-1471F and 6R-IGS primers (listed in Table S4). *Streptococcus*  
615 *oralis*, *S. mitis*, and *S. pneumoniae* were further differentiated by PCR of a region of the  
616 *gdh* gene and sequencing as previously described using the Strep-gdhF and Strep-  
617 gdhR primers (listed in Table S4) (64). The Phusion Polymerase PCR protocol (New  
618 England Biolabs) was followed for preparing 50 $\mu$ l reactions, and the PCR conditions for  
619 the 16S-ITS region were: 98 $^{\circ}$ C for 30s followed by 25 cycles of 98 $^{\circ}$ C for 10s, 61 $^{\circ}$ C for  
620 15s, 72 $^{\circ}$ C for 30s, a final extension at 72 $^{\circ}$ C for 7 minutes. The PCR conditions for  
621 amplifying *gdh* were as follows: 98 $^{\circ}$ C for 30s, followed by 30 cycles of 98 $^{\circ}$ C for 10s,  
622 57.9 $^{\circ}$ C for 15s, 72 $^{\circ}$ C for 30s followed by a final extension at 72 $^{\circ}$ C for 7 minutes. The  
623 resulting PCR products were imaged on a 1% agarose gel with Sybr Safe (Thermo  
624 Fisher Scientific Inc.). The remaining PCR reaction was purified using the QIAquick  
625 PCR Purification kit (QIAGEN), and the purified DNA product was sequenced at the  
626 Dartmouth Molecular Biology Core Facility using the Applied Biosystems 3730 DNA  
627 Analyzer. Sequence results were analyzed using NCBI BLAST for species identification.

628

629 **Mixed microbial coculture system.** Cocultures were conducted as previously  
630 described in the CFBE model system (3, 9, 24, 37) with some modifications. Overnight  
631 cultures of *P. aeruginosa* and *Streptococcus* spp. were individually centrifuged at

632 10,000 x *g* for 3 minutes, the cell pellet was washed with 1.5 ml minimal essential  
633 medium (MEM) supplemented with 2 mM L-glutamine (MEM+L-Gln), centrifuged again,  
634 and the cell pellet was resuspended in 1.5 ml MEM+L-Gln. The optical density at 600nm  
635 (OD<sub>600</sub>) of each culture was determined and the *P. aeruginosa* cultures were adjusted in  
636 MEM+L-Gln to an OD<sub>600</sub> of 0.05. The *Streptococcus* spp. cultures were adjusted to an  
637 OD<sub>600</sub> of 0.1. *S. sanguinis* SK36 overnight cultures were adjusted to an OD<sub>600</sub> of 0.1,  
638 then further diluted 1:100 in MEM+L-Gln due to the robust growth *S. sanguinis* SK36  
639 exhibits in monoculture. A 1:1 mixture by volume of *P. aeruginosa* and *Streptococcus*  
640 spp. was prepared from the adjusted cultures. Three wells of a 96-well plate were  
641 inoculated per monoculture and coculture condition with 100uL per well. The culture  
642 plates were then incubated statically for 1 hour at 37°C with 5% CO<sub>2</sub>, at which point the  
643 unattached planktonic cells were aspirated with a multichannel pipette and replaced  
644 with 100µl MEM supplemented with 2mM L-glutamine and 0.4% L-arginine (MEM+L-  
645 Gln+L-Arg). The culture plates were incubated statically for an additional 5.5 hours, at  
646 which point the supernatant was removed and replaced with 100µl MEM+L-Gln+L-Arg.  
647 0.4% L-arginine is added to the minimal medium at the 1 and 5.5h medium changes to  
648 promote *P. aeruginosa* biofilm formation (65). At 21 hours post-inoculation, planktonic  
649 cells were removed to be plated and biofilms were disrupted using a 96 pin replicator in  
650 100µl of MEM+L-Gln. Both planktonic and biofilm cells were 10-fold serially diluted and  
651 plated on selective media. PIA plates were grown overnight aerobically, and blood agar  
652 plates were grown overnight in AnaeroPak-Anaero containers (Thermo Scientific) with  
653 GasPak satchets (BD) to selectively grow *P. aeruginosa* and *Streptococcus* spp.,

654 respectively. Following overnight incubation, colonies were counted and the colony  
655 forming units (CFU) per milliliter of culture were determined.

656

657 **Growth kinetics in mixed microbial coculture system.** *P. aeruginosa* PA14 and  
658 PAO1 were grown in coculture with *S. sanguinis* SK36 as described above, with one 96-  
659 well plate per time point. Six time points were assessed: 0, 3, 5.5, 7.5, 10, and 24 hours.  
660 The 0-hour time point corresponds to the initial inoculum. At each time point, the  
661 planktonic and biofilm cells from the same wells were serially diluted and plated on PIA  
662 and blood agar. Cells were harvested from the 5.5 hour time point plate prior to the 5.5  
663 hour medium exchange.

664

665 **Coculture in rich media.** *P. aeruginosa* PA14 was grown in coculture with *S. sanguinis*  
666 SK36 as described above, but with the following changes: at the 1h media change, the  
667 MEM+L-gln was removed and replaced with 100 $\mu$ l LB or THY. 100 $\mu$ l of fresh LB or THY  
668 were used at the 5.5h media change as well. This allows all of the culture conditions to  
669 originate from the same inocula.

670

671 **Construction of *P. aeruginosa* PA14 deletion mutant strains.** The pMQ30 vector  
672 (Table S3) was used to generate the *P. aeruginosa* PA14  $\Delta katA$ ,  $\Delta katB$ ,  $\Delta katA\Delta katB$ ,  
673 and  $\Delta dbpA$  mutant strains. The pMQ30-*katA*, pMQ30-*katB*, and pMQ30-*dbpA* deletion  
674 constructs were built using homologous recombination of the PCR products made with  
675 the respective “KO” primers (listed in Table S4) with the Xba1 restriction enzyme-  
676 digested pMQ30 in yeast as previously reported (63). Plasmid integrants were isolated

677 on LB agar supplemented with gentamicin and nalidixic acid followed by  
678 counterselection on sucrose medium. Deletion mutants were confirmed by PCR with  
679 respective “conf.” primers (Table S4), followed by sequencing. Coculture was conducted  
680 as described above with the confirmed *P. aeruginosa* PA14 deletion mutant strains.

681

682 **Genetic screen.** The Ausubel lab created a nonredundant *P. aeruginosa* PA14  
683 transposon library (PA14NR set) in 96-well plate format (65). Initially, a 96 pin replicator  
684 was used to transfer inocula from the frozen library to a sterile 96-well plate containing  
685 150µl of LB per well. The plate was then incubated statically for 24 hours at 37°C. *S.*  
686 *constellatus* 7155 frozen aliquots were made from 750µl of overnight culture mixed with  
687 750µl of 40% glycerol. The day of the coculture experiment, frozen *S. constellatus* 7155  
688 aliquots were thawed and 500µl of aliquot were added to 4.5ml THY cultures with 100µl  
689 Oxyrase, and were grown for 6-8h at 37°C with 5% CO<sub>2</sub>. The *S. constellatus* 7155  
690 culture was then adjusted to an OD<sub>600</sub> of 0.05 in MEM+L-Gln, and 100µl of adjusted  
691 culture were added to each well of a sterile 96-well plate. The PA14NR set was grown  
692 in LB for 24 hr in a 96 well plate format - each well contained a transposon mutant from  
693 the *P. aeruginosa* PA14NR set. A 96 pin replicator was then used to transfer 2-3µl of  
694 culture from the transposon library plate into the plate containing *S. constellatus* 7155.  
695 The coculture plates were then incubated statically for 2 hours at 37°C with 5% CO<sub>2</sub>.  
696 After 2 hours, the supernatant and unattached bacteria were aspirated using a  
697 multichannel pipette and 100µl MEM+L-Gln with 5µg/ml tobramycin to suppress *P.*  
698 *aeruginosa* PA14 rhamnolipid production were added to each well. The plates were  
699 then incubated statically for an additional 20 hours at 37°C with 5% CO<sub>2</sub>. At 22 hours

700 post-inoculation, the 96 pin replicator was used to disrupt the biofilms into the  
701 supernatant fraction. The 96 pin replicator was then used to spot culture onto large petri  
702 plates containing either PIA or *Streptococcus* selection agar. PIA plates were incubated  
703 overnight at 37°C, and *Streptococcus* selection agar plates were incubated for 24 hours  
704 at 37°C with 5% CO<sub>2</sub>. In the initial screen, we identified *P. aeruginosa* mutants that  
705 showed low or undetectable *S. constellatus* 7155 growth. To confirm the phenotype, the  
706 candidate *P. aeruginosa* PA14 transposon mutant strain was picked from the PIA plate  
707 and grown statically overnight at 37°C in a sterile 96-well plate in 125µl LB. The next  
708 morning, 125µl of 40% glycerol was added to each well containing *P. aeruginosa* PA14  
709 candidate mutants, and these “candidate mutant” plates were stored at -80°C for the  
710 next round of screening. For the second round of the screen, the coculture process  
711 described above was repeated with the plates containing candidate mutants.

712 If we had clean deletions of the candidate mutants, they were also tested in the  
713 assay above. If the clean deletion did not recapitulate the original transposon mutant,  
714 that transposon mutant was eliminated from the list of candidate mutants. Table S2  
715 shows the final list of *P. aeruginosa* PA14 transposon insertion mutant strains that  
716 yielded low or undetectable *S. constellatus* 7155 growth after rescreening.

717 We then tested each individual *P. aeruginosa* PA14 transposon mutant in Table  
718 S2 in our standard 96-well coculture assay as described above with *S. sanguinis* SK36.  
719 The two mutants that yielded consistently low *S. sanguinis* SK36 growth in our standard  
720 coculture are in bold in Table S2.

721



722 ***P. aeruginosa*  $\Delta pqsL$  complementation.** The pMQ72 vector (Table S3) with an  
723 arabinose-inducible promoter was used to complement the *P. aeruginosa* PA14  $\Delta pqsL$   
724 deletion mutant. The pMQ72-*pqsL* complementation plasmid was built using  
725 homologous recombination of the PCR product made with the *pqsL* comp 3' and *pqsL*  
726 comp 5' primers (listed in Table S4) with *SacI* restriction enzyme-digested pMQ72 in  
727 yeast as previously reported (63). *P. aeruginosa* PA14  $\Delta pqsL$ /pMQ72-*pqsL* and *P.*  
728 *aeruginosa* PA14  $\Delta pqsL$ /pMQ72-empty vector control strains were cocultured with *S.*  
729 *sanguinis* SK36 as described above with the following changes: at 1 and 5.5h post-  
730 inoculation, MEM+L-Gln+L-Arg supplemented with L-arabinose at 0% and 0.2% final  
731 concentration was added to the medium to induce pMQ72-*pqsL* gene expression.

732

733 ***P. aeruginosa*  $\Delta pchE$  complementation construct.** Due to the gene length (4.3 kb)  
734 and content of repetitive DNA, the *pchE* gene was amplified in two overlapping PCR  
735 fragments using Phusion polymerase (NEB). Fragment 1 was amplified using the  
736 primers *pchE* 5'.2 and *pchE* int R and fragment 2 was amplified with primers *pchE* int  
737 1B F (see Table S4 for primer sequences). The resulting PCR fragments were cloned  
738 into pMQ72 by homologous recombination in yeast as described above.

739

740 **Coculture with ferric chloride.** Coculture was conducted as described above, but with  
741 the following changes: at 1 and 5.5 hours post-inoculation, supernatants were aspirated  
742 with a multichannel pipette, and replaced with MEM+L-Gln+L-Arg, with or without  
743 freshly prepared, filter sterilized ferric chloride hexahydrate (ranging from 5 - 50 $\mu$ M).

744

745 **Anaerobic coculture.** Coculture was conducted as described above, but with the  
746 following alterations: once the plates were inoculated, they were incubated in  
747 AnaeroPak-Anaero containers with a GasPak satchet. At each medium change (1 hour,  
748 5.5 hours), a new satchet was added to the container to ensure anaerobic coculture  
749 conditions. The AnaeroPak container was incubated in the same incubator as the  
750 aerobic plate to control for any environmental effects.

751

752 **Complementing mutations of *S. sanguinis* SK36.** The ORFs of SSA\_1742 and  
753 SSA\_1744 were PCR amplified by PfuUltra II fusion HS DNA polymerase (Agilent  
754 Technologies) using primers F-1742-oe/R-1742-oe and F-1744-oe/R-1744-oe,  
755 respectively (see Table S4). The PCR productions and an IPTG-inducible plasmid  
756 pJFP126 were digested with SphI and/or HindIII, ligated, and electroporated into *E. coli*  
757 DH5 $\alpha$  (66). Plasmid DNA was purified from DH5 $\alpha$  cells using a Qiagen Mini Prep kit  
758 (Qiagen). Transformation of *S. sanguinis* strains with each plasmid was carried out as  
759 previously described (29). The DNA fragment containing gene expression elements and  
760 the *aad9* gene, encoding resistance to Spc, was transferred from the plasmid to the  
761 genome of the resulting *S. sanguinis* strains.

762

763

764 **Literature Cited**

- 765 1. Riordan JR, Rommens JM, Kerem B, Alon N, Rozmahel R, Grzelczak Z,  
766 Zielenski J, Lok S, Plavsic N, Chou JL, et al. 1989. Identification of the cystic  
767 fibrosis gene: cloning and characterization of complementary DNA. *Science*  
768 245:1066-73.
- 769 2. Elborn JS. 2016. Cystic fibrosis. *Lancet* 388:2519-2531.
- 770 3. Orazi G, O'Toole GA. 2016. *Pseudomonas aeruginosa* alters *Staphylococcus*  
771 *aureus* sensitivity to vancomycin in a biofilm model of Cystic Fibrosis infection. in  
772 preparation.
- 773 4. Tavernier S, Crabbe A, Hacıoglu M, Stuer L, Henry S, Rigole P, Dhondt I,  
774 Coenye T. 2017. Community composition determines activity of antibiotics  
775 against multispecies biofilms. *Antimicrob Agents Chemother* 61.
- 776 5. Parkins MD, Sibley CD, Surette MG, Rabin HR. 2008. The *Streptococcus milleri*  
777 group--an unrecognized cause of disease in cystic fibrosis: a case series and  
778 literature review. *Pediatr Pulmonol* 43:490-7.
- 779 6. Cade A, Denton M, Brownlee KG, Todd N, Conway SP. 1999. Acute  
780 bronchopulmonary infection due to *Streptococcus milleri* in a child with cystic  
781 fibrosis. *Arch Dis Child* 80:278-9.
- 782 7. Sibley CD, Duan K, Fischer C, Parkins MD, Storey DG, Rabin HR, Surette MG.  
783 2008. Discerning the complexity of community interactions using a *Drosophila*  
784 model of polymicrobial infections. *PLoS Pathog* 4:e1000184.

- 785 8. Sibley CD, Sibley KA, Leong TA, Grinwis ME, Parkins MD, Rabin HR, Surette  
786 MG. 2010. The *Streptococcus milleri* population of a cystic fibrosis clinic reveals  
787 patient specificity and intraspecies diversity. J Clin Microbiol 48:2592-4.
- 788 9. Filkins LM, Hampton TH, Gifford AH, Gross MJ, Hogan DA, Sogin ML, Morrison  
789 HG, Paster BJ, O'Toole GA. 2012. The prevalence of streptococci and increased  
790 polymicrobial diversity associated with cystic fibrosis patient stability. J Bacteriol  
791 194:4709-17.
- 792 10. Flight WG, Smith A, Paisey C, Marchesi JR, Bull MJ, Norville PJ, Mutton KJ,  
793 Webb AK, Bright-Thomas RJ, Jones AM, Mahenthiralingam E. 2015. Rapid  
794 detection of emerging pathogens and loss of microbial diversity associated with  
795 severe lung disease in cystic fibrosis. J Clin Microbiol 53:2022-9.
- 796 11. Acosta N, Heirali A, Somayaji R, Surette MG, Workentine ML, Sibley CD, Rabin  
797 HR, Parkins MD. 2018. Sputum microbiota is predictive of long-term clinical  
798 outcomes in young adults with cystic fibrosis. Thorax 73:1016-1025.
- 799 12. O'Toole GA. 2018. Cystic fibrosis airway microbiome: Overturning the old,  
800 opening the way for the new. J Bacteriol 200.
- 801 13. Marshall B, Elbert A, Petren K, Rizvi S, Fink A, Ostrenga J, Sewall A, D. L. 2016.  
802 Patient Registry: Annual Data Report 2015. Cyst Fibros Found Patient Regist 1–  
803 94.
- 804 14. Rudkjobing VB, Thomsen TR, Alhede M, Kragh KN, Nielsen PH, Johansen UR,  
805 Givskov M, Hoiby N, Bjarsholt T. 2012. The microorganisms in chronically  
806 infected end-stage and non-end-stage cystic fibrosis patients. FEMS Immunol  
807 Med Microbiol 65:236-44.

- 808 15. Sibley CD, Parkins MD, Rabin HR, Duan K, Norgaard JC, Surette MG. 2008. A  
809 polymicrobial perspective of pulmonary infections exposes an enigmatic  
810 pathogen in cystic fibrosis patients. *Proc Natl Acad Sci U S A* 105:15070-5.
- 811 16. Hogan DA, Willger SD, Dolben EL, Hampton TH, Stanton BA, Morrison HG,  
812 Sogin ML, Czum J, Ashare A. 2016. Analysis of lung microbiota in  
813 bronchoalveolar lavage, protected brush and sputum samples from subjects with  
814 mild-to-moderate Cystic Fibrosis lung disease. *PLoS One* 11:e0149998.
- 815 17. Whiley RA, Fleming EV, Makhija R, Waite RD. 2015. Environment and  
816 colonisation sequence are key parameters driving cooperation and competition  
817 between *Pseudomonas aeruginosa* cystic fibrosis strains and oral commensal  
818 streptococci. *PLoS One* 10:e0115513.
- 819 18. Whiley RA, Sheikh NP, Mushtaq N, Hagi-Pavli E, Personne Y, Javaid D, Waite  
820 RD. 2014. Differential potentiation of the virulence of the *Pseudomonas*  
821 *aeruginosa* cystic fibrosis liverpool epidemic strain by oral commensal  
822 *Streptococci*. *J Infect Dis* 209:769-80.
- 823 19. Duan K, Dammel C, Stein J, Rabin H, Surette MG. 2003. Modulation of  
824 *Pseudomonas aeruginosa* gene expression by host microflora through  
825 interspecies communication. *Mol Microbiol* 50:1477-91.
- 826 20. Waite RD, Qureshi MR, Whiley RA. 2017. Modulation of behaviour and virulence  
827 of a high alginate expressing *Pseudomonas aeruginosa* strain from cystic fibrosis  
828 by oral commensal bacterium *Streptococcus anginosus*. *PLoS One*  
829 12:e0173741.

- 830 21. Scoffield JA, Wu H. 2016. Nitrite reductase is critical for *Pseudomonas*  
831 *aeruginosa* survival during co-infection with the oral commensal *Streptococcus*  
832 *parasanguinis*. *Microbiology* 162:376-83.
- 833 22. Scoffield JA, Wu H. 2015. Oral streptococci and nitrite-mediated interference of  
834 *Pseudomonas aeruginosa*. *Infect Immun* 83:101-7.
- 835 23. Waite RD, Qureshi MR, Whiley RA. 2017. Correction: Modulation of behaviour  
836 and virulence of a high alginate expressing *Pseudomonas aeruginosa* strain from  
837 cystic fibrosis by oral commensal bacterium *Streptococcus anginosus*. *PLoS One*  
838 12:e0176577.
- 839 24. Price KE, Naimie AA, Griffin EF, Bay C, O'Toole GA. 2015. Tobramycin-treated  
840 *Pseudomonas aeruginosa* PA14 enhances *Streptococcus constellatus* 7155  
841 biofilm formation in a cystic fibrosis model system. *J Bacteriol* 198:237-47.
- 842 25. Scoffield JA, Duan D, Zhu F, Wu H. 2017. A commensal streptococcus hijacks a  
843 *Pseudomonas aeruginosa* exopolysaccharide to promote biofilm formation. *PLoS*  
844 *Pathog* 13:e1006300.
- 845 26. Xu P, Alves JM, Kitten T, Brown A, Chen Z, Ozaki LS, Manque P, Ge X, Serrano  
846 MG, Puiu D, Hendricks S, Wang Y, Chaplin MD, Akan D, Paik S, Peterson DL,  
847 Macrina FL, Buck GA. 2007. Genome of the opportunistic pathogen  
848 *Streptococcus sanguinis*. *J Bacteriol* 189:3166-75.
- 849 27. Stover CK, Pham XQ, Erwin AL, Mizoguchi SD, Warrener P, Hickey MJ,  
850 Brinkman FS, Hufnagle WO, Kowalik DJ, Lagrou M, Garber RL, Goltry L,  
851 Tolentino E, Westbrook-Wadman S, Yuan Y, Brody LL, Coulter SN, Folger KR,  
852 Kas A, Larbig K, Lim R, Smith K, Spencer D, Wong GK, Wu Z, Paulsen IT. 2000.

- 853 Complete genome sequence of *Pseudomonas aeruginosa* PA01, an  
854 opportunistic pathogen. *Nature* 406:959-64.
- 855 28. Winsor GL, Van Rossum T, Lo R, Khaira B, Whiteside MD, Hancock RE,  
856 Brinkman FS. 2009. *Pseudomonas* Genome Database: facilitating user-friendly,  
857 comprehensive comparisons of microbial genomes. *Nucleic Acids Res* 37:D483-  
858 8.
- 859 29. Chen L, Ge X, Xu P. 2015. Identifying essential *Streptococcus sanguinis* genes  
860 using genome-wide deletion mutation. *Methods Mol Biol* 1279:15-23.
- 861 30. Xu P, Ge X, Chen L, Wang X, Dou Y, Xu JZ, Patel JR, Stone V, Trinh M, Evans  
862 K, Kitten T, Bonchev D, Buck GA. 2011. Genome-wide essential gene  
863 identification in *Streptococcus sanguinis*. *Sci Rep* 1:125.
- 864 31. Jacobs MA, Alwood A, Thaipisuttikul I, Spencer D, Haugen E, Ernst S, Will O,  
865 Kaul R, Raymond C, Levy R, Chun-Rong L, Guenther D, Bovee D, Olson MV,  
866 Manoil C. 2003. Comprehensive transposon mutant library of *Pseudomonas*  
867 *aeruginosa*. *Proc Natl Acad Sci U S A* 100:14339-14344.
- 868 32. Maeda Y, Elborn JS, Parkins MD, Reihill J, Goldsmith CE, Coulter WA, Mason C,  
869 Millar BC, Dooley JS, Lowery CJ, Ennis M, Rendall JC, Moore JE. 2011.  
870 Population structure and characterization of viridans group streptococci (VGS)  
871 including *Streptococcus pneumoniae* isolated from adult patients with cystic  
872 fibrosis (CF). *J Cyst Fibros* 10:133-9.
- 873 33. Toyofuku M, Nakajima-Kambe T, Uchiyama H, Nomura N. 2010. The effect of a  
874 cell-to-cell communication molecule, *Pseudomonas* quinolone signal (PQS),  
875 produced by *P. aeruginosa* on other bacterial species. *Microbes Environ* 25:1-7.

- 876 34. Morales DK, Hogan DA. 2010. *Candida albicans* interactions with bacteria in the  
877 context of human health and disease. PLoS pathogens 6:e1000886.
- 878 35. Chen AI, Dolben EF, Okegbe C, Harty CE, Golub Y, Thao S, Ha DG, Willger SD,  
879 O'Toole GA, Harwood CS, Dietrich LE, Hogan DA. 2014. *Candida albicans*  
880 ethanol stimulates *Pseudomonas aeruginosa* WspR-controlled biofilm formation  
881 as part of a cyclic relationship involving phenazines. PLoS Pathog 10:e1004480.
- 882 36. Filkins LM, Graber JA, Olson DG, Dolben EL, Lynd LR, Bhujju S, O'Toole GA.  
883 2015. Coculture of *Staphylococcus aureus* with *Pseudomonas aeruginosa* drives  
884 *S. aureus* towards fermentative metabolism and reduced viability in a cystic  
885 fibrosis model. J Bacteriol 197:2252-64.
- 886 37. Limoli DH, Ivey ML, Filkins LM, Grahl N, Whitfield G, Howell PL, Hogan DA,  
887 O'Toole GA, Goldberg JB. 2016. *Pseudomonas aeruginosa* alginate  
888 overproduction promotes co-existence with *Staphylococcus aureus* in a model of  
889 cystic fibrosis respiratory infections. manuscript in preparation.
- 890 38. Brown SM, Howell ML, Vasil ML, Anderson AJ, Hassett DJ. 1995. Cloning and  
891 characterization of the *katB* gene of *Pseudomonas aeruginosa* encoding a  
892 hydrogen peroxide-inducible catalase: purification of KatB, cellular localization,  
893 and demonstration that it is essential for optimal resistance to hydrogen peroxide.  
894 J Bacteriol 177:6536-44.
- 895 39. Malhotra S, Limoli DH, English AE, Parsek MR, Wozniak DJ. 2018. Mixed  
896 communities of mucoid and nonmucoid *Pseudomonas aeruginosa* exhibit  
897 enhanced resistance to host antimicrobials. MBio 9: pii: e00275-18.



- 898 40. Hassett DJ, Alsabbagh E, Parvatiyar K, Howell ML, Wilmott RW, Ochsner UA.  
899 2000. A protease-resistant catalase, KatA, released upon cell lysis during  
900 stationary phase is essential for aerobic survival of a *Pseudomonas aeruginosa*  
901 *oxyR* mutant at low cell densities. J Bacteriol 182:4557-63.
- 902 41. Jakubovics NS, Yassin SA, Rickard AH. 2014. Community interactions of oral  
903 streptococci. Adv Appl Microbiol 87:43-110.
- 904 42. Zhu L, Kreth J. 2012. The role of hydrogen peroxide in environmental adaptation  
905 of oral microbial communities. Oxid Med Cell Longev 2012:717843.
- 906 43. Lee JS, Heo YJ, Lee JK, Cho YH. 2005. KatA, the major catalase, is critical for  
907 osmoprotection and virulence in *Pseudomonas aeruginosa* PA14. Infect Immun  
908 73:4399-403.
- 909 44. Liberati NT, Urbach JM, Miyata S, Lee DG, Drenkard E, Wu G, Villanueva J, Wei  
910 T, Ausubel FM. 2006. An ordered, nonredundant library of *Pseudomonas*  
911 *aeruginosa* strain PA14 transposon insertion mutants. Proc Natl Acad Sci U S A  
912 103:2833-8.
- 913 45. Shajani Z, Sykes MT, Williamson JR. 2011. Assembly of bacterial ribosomes.  
914 Annu Rev Biochem 80:501-26.
- 915 46. Gentry RC, Childs JJ, Gevorkyan J, Gerasimova YV, Koculi E. 2016. Time  
916 course of large ribosomal subunit assembly in *E. coli* cells overexpressing a  
917 helicase inactive DbpA protein. RNA 22:1055-64.
- 918 47. Fergie N, Bayston R, Pearson JP, Birchall JP. 2004. Is otitis media with effusion  
919 a biofilm infection? Clin Otolaryngol Allied Sci 29:38-46.

- 920 48. Gallagher LA, McKnight SL, Kuznetsova MS, Pesci EC, Manoil C. 2002.  
921 Functions required for extracellular quinolone signaling by *Pseudomonas*  
922 *aeruginosa*. J Bacteriol 184:6472-6480.
- 923 49. D'Argenio DA, Calfee MW, Rainey PB, Pesci EC. 2002. Autolysis and  
924 autoaggregation in *Pseudomonas aeruginosa* colony morphology mutants. J  
925 Bacteriol 184:6481-9.
- 926 50. Pesci EC, Milbank JBJ, Pearson JP, McKnight S, Kende AS, Greenberg EP,  
927 Iglewski BH. 1999. Quinolone signaling in the cell-to-cell communication system  
928 of *Pseudomonas aeruginosa*. Proc Natl Acad Sci USA 96:11229-11234.
- 929 51. Maura D, Hazan R, Kitao T, Ballok AE, Rahme LG. 2016. Evidence for direct  
930 control of virulence and defense gene circuits by the *Pseudomonas aeruginosa*  
931 quorum sensing regulator, MvfR. Sci Rep 6:34083.
- 932 52. Wade DS, Calfee MW, Rocha ER, Ling EA, Engstrom E, Coleman JP, Pesci EC.  
933 2005. Regulation of *Pseudomonas* quinolone signal synthesis in *Pseudomonas*  
934 *aeruginosa*. J Bacteriol 187:4372-80.
- 935 53. Rampioni G, Falcone M, Heeb S, Frangipani E, Fletcher MP, Dubern JF, Visca  
936 P, Leoni L, Camara M, Williams P. 2016. Unravelling the genome-wide  
937 contributions of specific 2-alkyl-4-quinolones and PqsE to quorum sensing in  
938 *Pseudomonas aeruginosa*. PLoS Pathog 12:e1006029.
- 939 54. Diggle SP, Matthijs S, Wright VJ, Fletcher MP, Chhabra SR, Lamont IL, Kong X,  
940 Hider RC, Cornelis P, Camara M, Williams P. 2007. The *Pseudomonas*  
941 *aeruginosa* 4-quinolone signal molecules HHQ and PQS play multifunctional  
942 roles in quorum sensing and iron entrapment. Chem Biol 14:87-96.

- 943 55. Bredenbruch F, Geffers R, Nimtz M, Buer J, Haussler S. 2006. The  
944 *Pseudomonas aeruginosa* quinolone signal (PQS) has an iron-chelating activity.  
945 Environ Microbiol 8:1318-29.
- 946 56. Sonderholm M, Kragh KN, Koren K, Jakobsen TH, Darch SE, Alhede M, Jensen  
947 PO, Whiteley M, Kuhl M, Bjarnsholt T. 2017. *Pseudomonas aeruginosa*  
948 aggregate formation in an alginate bead model system exhibits in vivo-like  
949 characteristics. Appl Environ Microbiol 83.
- 950 57. Haussler S, Becker T. 2008. The *Pseudomonas* quinolone signal (PQS)  
951 balances life and death in *Pseudomonas aeruginosa* populations. PLoS Pathog  
952 4:e1000166.
- 953 58. Filkins LM, O'Toole GA. 2015. Cystic fibrosis lung infections: Polymicrobial,  
954 complex, and hard to treat. PLoS Pathog 11:e1005258.
- 955 59. Stites SW, Plautz MW, Bailey K, O'Brien-Ladner AR, Wesselius LJ. 1999.  
956 Increased concentrations of iron and isoferritins in the lower respiratory tract of  
957 patients with stable cystic fibrosis. Am J Respir Crit Care Med 160:796-801.
- 958 60. Stites SW, Walters B, O'Brien-Ladner AR, Bailey K, Wesselius LJ. 1998.  
959 Increased iron and ferritin content of sputum from patients with cystic fibrosis or  
960 chronic bronchitis. Chest 114:814-9.
- 961 61. Moreau-Marquis S, Bomberger JM, Anderson GG, Swiatecka-Urban A, Ye S,  
962 O'Toole GA, Stanton BA. 2008. The DeltaF508-CFTR mutation results in  
963 increased biofilm formation by *Pseudomonas aeruginosa* by increasing iron  
964 availability. American journal of physiology: Lung cellular and molecular  
965 physiology 295:L25-37.

- 966 62. Coss-Bu JA, Sachdeva RC, Bricker JT, Harrison GM, Jefferson LS. 1997.  
967 Hemoptysis: a 10-year retrospective study. *Pediatrics* 100:E7.
- 968 63. Shanks RM, Caiazza NC, Hinsa SM, Toutain CM, O'Toole GA. 2006.  
969 *Saccharomyces cerevisiae*-based molecular tool kit for manipulation of genes  
970 from gram-negative bacteria. *Applied and environmental microbiology* 72:5027-  
971 36.
- 972 64. Nielsen XC, Justesen US, Dargis R, Kemp M, Christensen JJ. 2009.  
973 Identification of clinically relevant nonhemolytic *Streptococci* on the basis of  
974 sequence analysis of 16S-23S intergenic spacer region and partial *gdh* gene. *J*  
975 *Clin Microbiol* 47:932-9.
- 976 65. Anderson GG, Moreau-Marquis S, Stanton BA, O'Toole GA. 2008. In vitro  
977 analysis of tobramycin-treated *Pseudomonas aeruginosa* biofilms on cystic  
978 fibrosis-derived airway epithelial cells. *Infection and immunity* 76:1423-33.
- 979 66. Rhodes DV, Crump KE, Makhlynets O, Snyder M, Ge X, Xu P, Stubbe J, Kitten  
980 T. 2014. Genetic characterization and role in virulence of the ribonucleotide  
981 reductases of *Streptococcus sanguinis*. *J Biol Chem* 289:6273-87.  
982  
983

984 **Figure Legends**

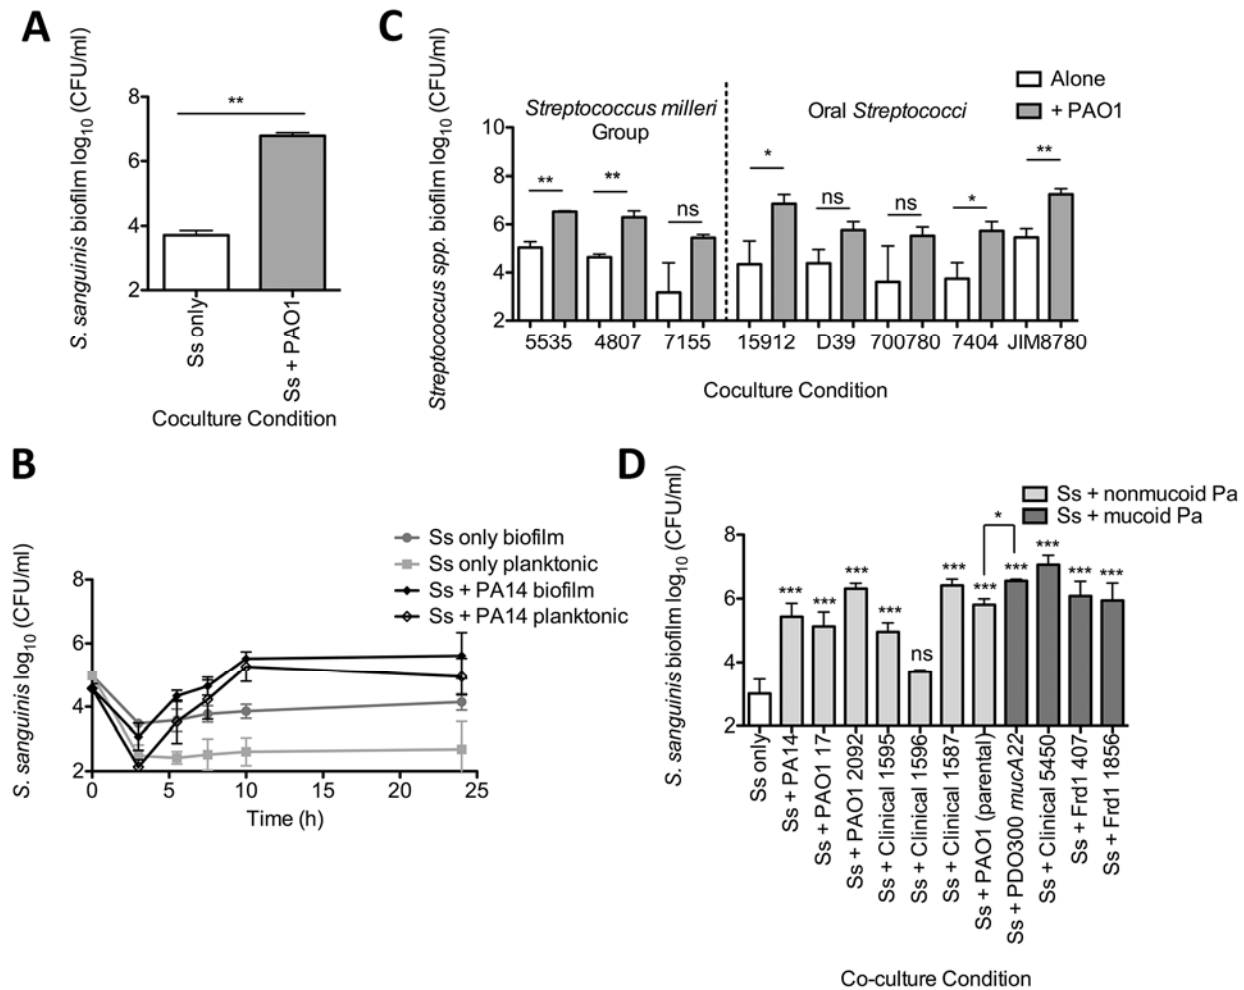

985  
 986 **Figure 1. *P. aeruginosa* enhanced growth of *Streptococcus* spp. in coculture.** (A to  
 987 D) Coculture assays were conducted to investigate streptococcal growth when  
 988 cocultured with *P. aeruginosa*. (A) *S. sanguinis* SK36 (Ss) cocultured with *P. aeruginosa*  
 989 PAO1. (B) Coculture growth kinetics of *S. sanguinis* with *P. aeruginosa* PA14 were  
 990 investigated. The time points each represent the average of three biological replicates  
 991 with three technical replicates. The error bars indicate SD. (C) A representative group of  
 992 clinical and reference *Streptococcus* strains were tested in coculture with *P. aeruginosa*  
 993 PAO1 (see Fig. S3A for all *Streptococcus* spp. strains tested). In this panel, each strain

994 is denoted by their strain number: *S. anginosus* 5535, *S. intermedius* 4807, *S.*  
995 *constellatus* 7155, *S. parasanguinis* ATCC15912, *S. pneumoniae* D39, *S. peroris*  
996 ATCC700780, *S. oralis* 7404, and *S. salivarius* JIM8780. (D) *S. sanguinis* SK36 was  
997 tested in coculture with multiple *P. aeruginosa* clinical and laboratory strains. (A, C, D)  
998 Each column represents the average of three biological replicates with three technical  
999 replicates. The error bars indicate the standard deviation. ns, not significant, \*,  $P < 0.05$ ,  
1000 \*\*,  $P < 0.01$ , and \*\*\*,  $P < 0.001$  by paired two-tailed student's *t*-test (A, C), repeated  
1001 measures one-way analysis of variance (ANOVA) with Tukey's multiple comparisons  
1002 posttest (D), and paired two-tailed student's *t*-test between Ss + PAO1 DHL08 and Ss +  
1003 PAO1 mucA22 (D). The corresponding graphs depicting *P. aeruginosa* growth in these  
1004 assays can be found in Figures S1-4.  
1005  
1006

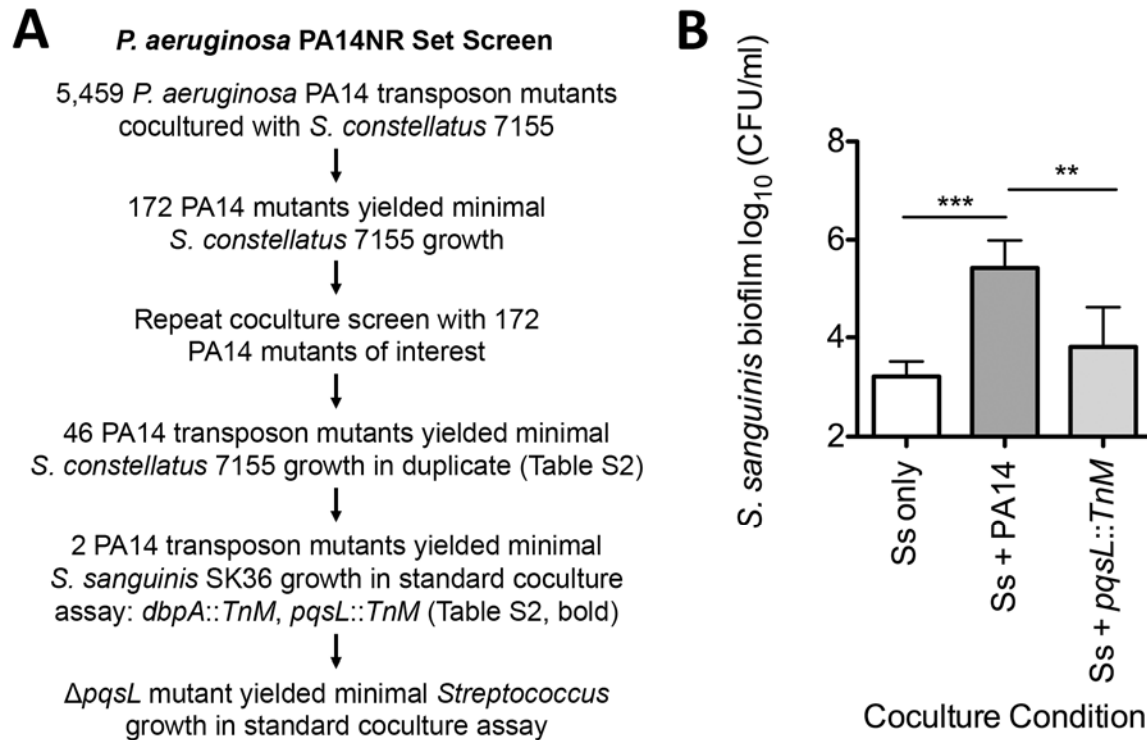

1007

1008 **Figure 2. Screening for *P. aeruginosa* PA14 mutants altered in interaction with**

1009 ***Streptococcus*.** (A) An overview of the *P. aeruginosa* PA14NR Set transposon mutant

1010 screen used to identify *P. aeruginosa* transposon insertion mutants that can no longer

1011 enhance *S. constellatus* 7155 growth, and the number of *P. aeruginosa* PA14

1012 transposon insertion mutants identified in each step. (B) Coculture between a mutant

1013 strain identified in the screen, *P. aeruginosa pqsL::TnM*, and *S. sanguinis* SK36. Each

1014 bar represents the average of three biological replicates, each with three technical

1015 replicates. Error bars represent SD. \*\*, P < 0.01 and \*\*\*, P < 0.001 by repeated

1016 measures ANOVA with Tukey's multiple comparison posttest. *P. aeruginosa* growth

1017 data from this assay can be found in Figure S7.

1018

1019

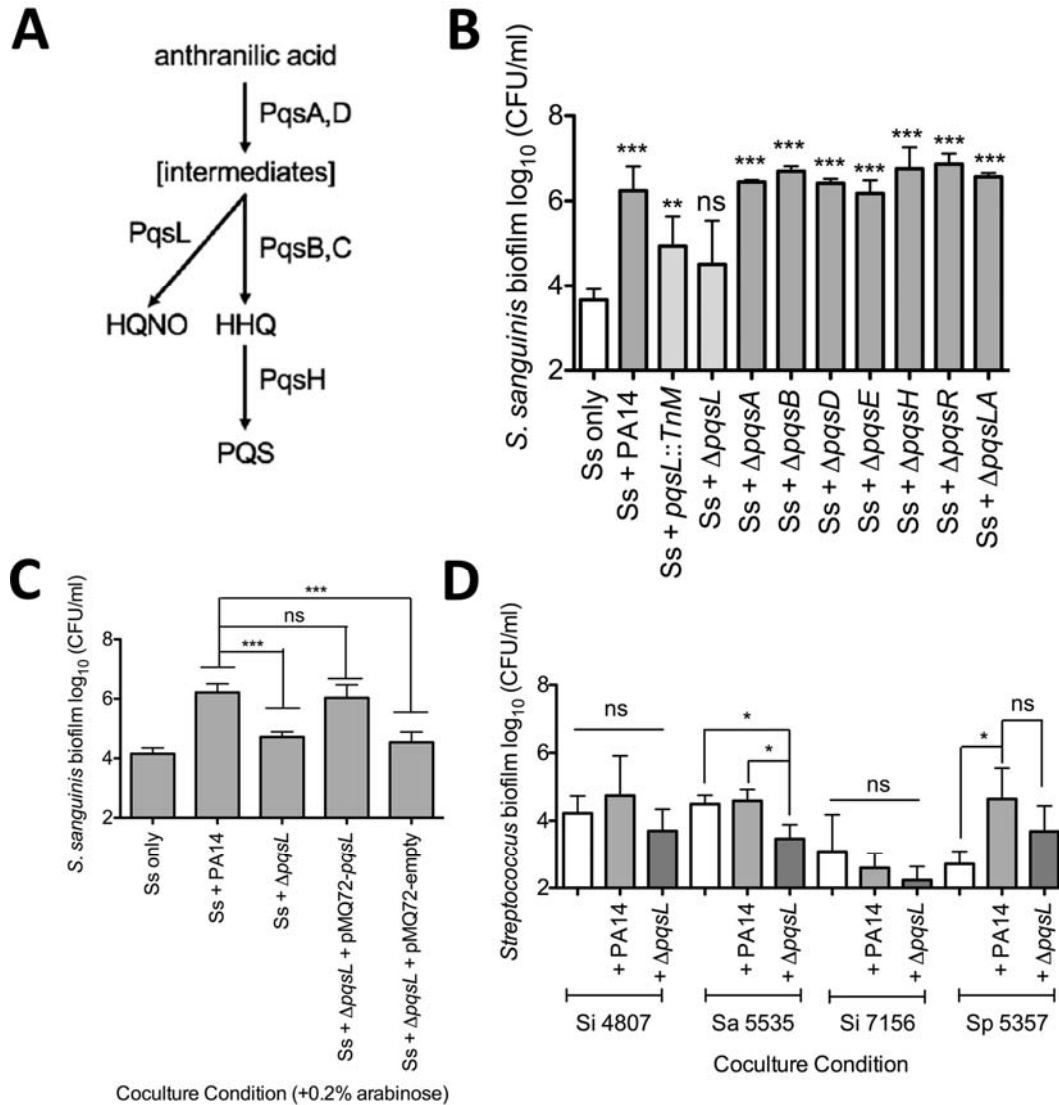

1020

1021 **Figure 3. The *P. aeruginosa* ΔpqsL mutant inhibits *Streptococcus* growth.** (A) The

1022 PQS biosynthetic pathway and the enzymes that catalyze each step are shown. (B)

1023 Coculture of *S. sanguinis* SK36 with wild-type *P. aeruginosa* PA14 and *P. aeruginosa*

1024 PA14 mutant strains lacking each enzyme in the PQS biosynthetic pathway. (C)

1025 Coculture of *S. sanguinis* SK36 with *P. aeruginosa* PA14, the ΔpqsL mutant, its

1026 complement pMQ72-pqsL and the vector control pMQ72 in the presence of 0.2%

1027 arabinose. (D) Coculture of representative streptococci from Figure 1 in coculture with



1028 the wild-type *P. aeruginosa* PA14 and the  $\Delta pqsL$  mutant strain. In each panel, bars  
1029 represent the average of three biological replicates, each with at least three technical  
1030 replicates. Error bars indicate SD. ns, not significant, \*,  $P < 0.05$ , \*\*,  $P < 0.01$ , and \*\*\*,  $P$   
1031  $< 0.001$  by repeated measures ANOVA with Dunnett's multiple comparisons posttest  
1032 with *Streptococcus*-only as the control condition (B) and repeated measures ANOVA  
1033 with Tukey's multiple comparisons posttest (C and D). The corresponding *P. aeruginosa*  
1034 growth data for these experiments can be found in Figures S8-10.

1035

1036

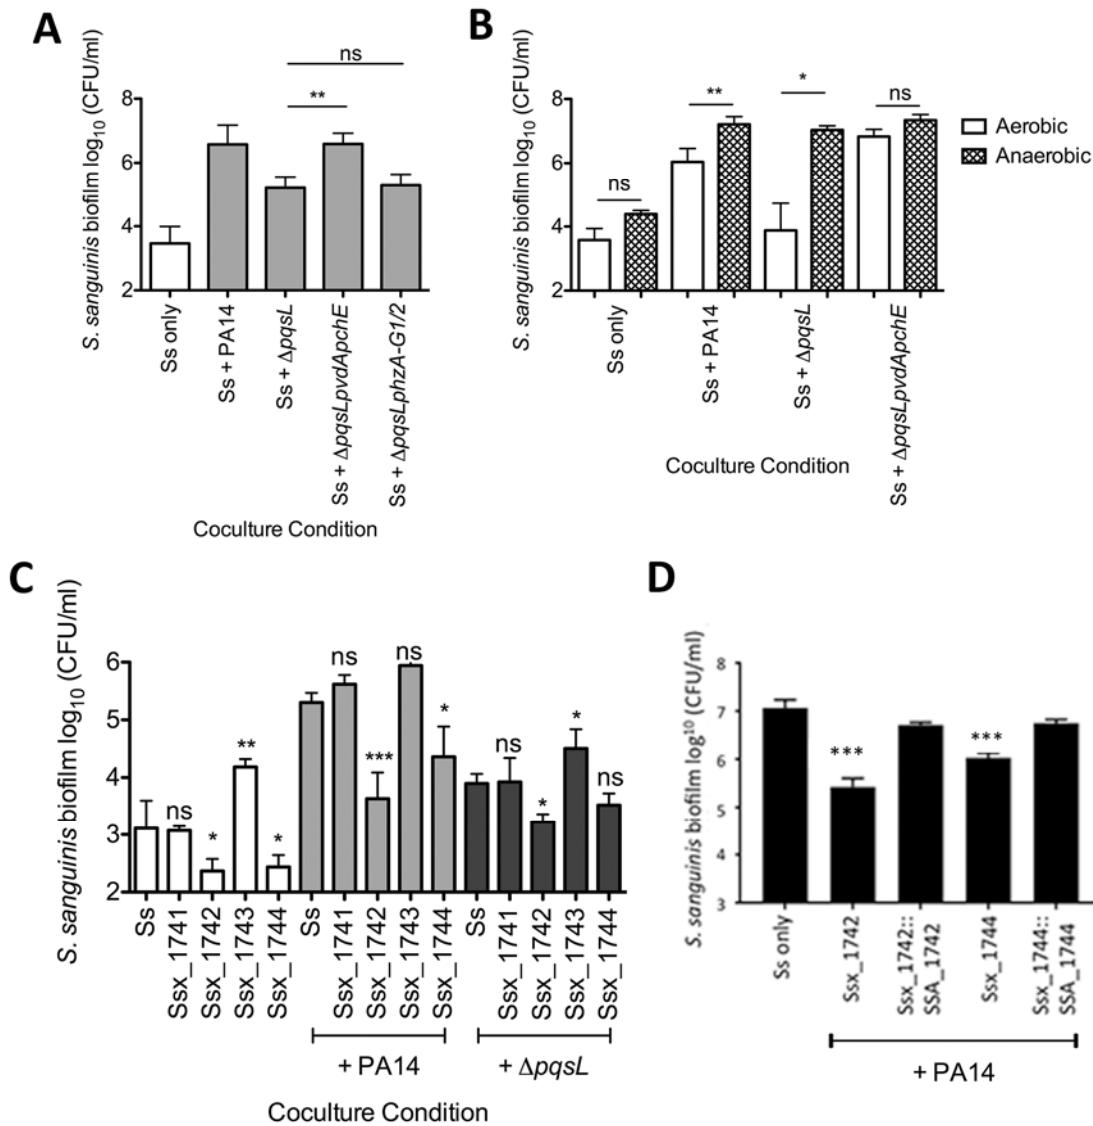

1037

1038 **Figure 4. *P. aeruginosa* ΔpqsL mutant likely inhibits *Streptococcus* growth by**  
 1039 **sequestering iron via siderophore production. (A) Coculture of *S. sanguinis* SK36**  
 1040 **with *P. aeruginosa* PA14 mutant strains lacking *pqsL*, and siderophore**  
 1041 **(ΔpqsLpvdApchE) or phenazine genes (ΔpqsLphzA-G1/2). (B) Coculture of *S. sanguinis***  
 1042 **SK36 with *P. aeruginosa* PA14 mutant strains in 5% CO<sub>2</sub> (aerobic) or in anaerobic**  
 1043 **growth conditions. (C) Coculture of *S. sanguinis* SK36 gene replacement mutants**

1044 lacking putative iron acquisition genes with *P. aeruginosa* PA14 and the  $\Delta pqsL$  mutant.  
1045 (D) Complementation assays with the rescued Ssx\_1742 and Ssx1744 strains. Each  
1046 bar represents the average of three biological replicates, each with at least three  
1047 technical replicates. There was no significant difference between the wild-type *S.*  
1048 *sanguinis* SK36 and the two complemented strains. Error bars indicate SD. ns, not  
1049 significant, \*,  $P < 0.05$ , \*\*,  $P < 0.01$ , and \*\*\*,  $P < 0.001$  by repeated measures ANOVA  
1050 with Tukey's multiple comparisons posttest (A), paired two-tailed student's *t*-test (B),  
1051 repeated measures ANOVA with Dunnett's multiple comparisons posttest with *S.*  
1052 *sanguinis* (Ss) as the control condition (C) and paired two-tailed student's *t*-test  
1053 comparing each complemented and vector control strain, and paired two-tailed  
1054 student's *t*-test with a Bonferroni correction with the WT compared to both  
1055 complemented strains (D). The corresponding *P. aeruginosa* growth data for these  
1056 experiments can be found in Supp. Figure S11,13-14.  
1057  
1058

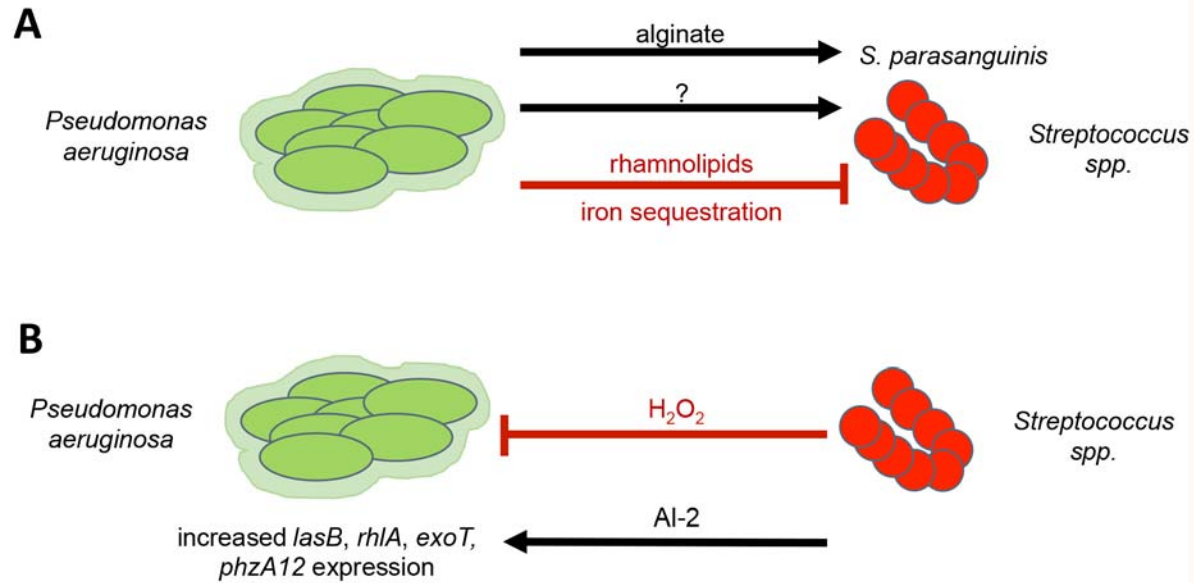

1059

1060 **Figure 5. A model for *P. aeruginosa*-*Streptococcus* interactions. (A-B) *P.***  
1061 *aeruginosa* has both positive and negative interactions with *Streptococcus* spp. (A) It  
1062 has been demonstrated previously that *P. aeruginosa* can enhance *S. parasanguinis*  
1063 biofilm formation through alginate secretion (25) or inhibit *Streptococcus* growth via  
1064 rhamnolipid secretion (24). Here we propose a negative interaction wherein iron  
1065 sequestration by *P. aeruginosa* limits *Streptococcus* spp. growth. *Streptococcus*  
1066 promoting factors produced by *P. aeruginosa* have not yet been identified (indicated by  
1067 the question mark). (B) Previous evidence also demonstrates that streptococci can  
1068 influence *P. aeruginosa* through AI-2 signaling (19), leading to enhanced *lasB*, *rhIA*,  
1069 *exoT*, and *phzA1/2* gene expression, or inhibit *P. aeruginosa* viability through  $H_2O_2$   
1070 production (17, 21, 22) and subsequent generation of reactive nitrogenous  
1071 intermediates (21, 22).

1072 **Table 1: *S. sanguinis* SK36 iron-related gene products.**

| <b>Gene Number</b> | <b>Predicted Gene Product</b>                                               |
|--------------------|-----------------------------------------------------------------------------|
| Ssx_0256           | ScaR metalloregulator                                                       |
| Ssx_0686           | Fe <sup>2+</sup> /Zn <sup>2+</sup> uptake regulation protein                |
| Ssx_1129           | periplasmic iron transport lipoprotein                                      |
| Ssx_1578           | ABC-type Fe <sup>3+</sup> -siderophore transport system, permease component |
| Ssx_1581           | FatB, metal-binding ABC transporter                                         |
| Ssx_1741           | ABC-type Fe <sup>3+</sup> -siderophores transporter, ATPase component       |
| Ssx_1742           | ferrichrome-binding protein                                                 |
| Ssx_1743           | ABC-type Fe <sup>3+</sup> -siderophore transport system, permease component |
| Ssx_1744           | iron compound ABC transporter, permease protein                             |
| Ssx_1745           | general stress response protein CsbD                                        |

1073
